# Supplementary material for: A cuboidal [Ni4O4] cluster as a precursor for recyclable, carbon-supported nickel nanoparticle reduction catalysts
Source: Royal Society of Chemistry journal article supplement (doi:10.1039/c7dt01579h), 2017-01-01
Supplement: c7dt01579h1.pdf [file c7dt01579h1.pdf]

## **Cuboidal [Ni<sub>4</sub>O<sub>4</sub>] cluster as a precursor to recyclable, carbon-supported nickel nanoparticle reduction catalysts**

Yan-Qiu Yuan,<sup>a</sup> Feng-Ling Yuan,<sup>a</sup> Fei-Long Li,<sup>a</sup> Zhi-Min Hao,<sup>a</sup> Jun Guo,<sup>a</sup> David J. Young,<sup>\*c</sup> Wen-Hua Zhang<sup>\*a</sup> and Jian-Ping Lang<sup>\*ab</sup>

<sup>a</sup> College of Chemistry, Chemical Engineering and Materials Science, Soochow University, Suzhou 215123, Jiangsu, P. R. China; E-mail: whzhang@suda.edu.cn; jplang@suda.edu.cn

<sup>b</sup> State Key Laboratory of Organometallic Chemistry, Shanghai Institute of Organic Chemistry, Chinese Academy of Sciences, Shanghai 200032, P. R. China.

<sup>c</sup> Faculty of Science, Health, Education and Engineering, University of the Sunshine Coast, Maroochydore, Queensland 4558, Australia; E-mail: dyoung1@usc.edu.au

### **Table of Contents**

- 1. Synthetic procedures of the ligand and compounds 1 – 4**
- 2. X-ray structure determination for 1 – 4**
- 3. Structural discussion of 2 – 4**
- 4. Procedure for the reduction of 4-nitrophenol (4-NP) to 4-aminophenol (4-AP) monitored by UV-vis**
- 5. Procedure for the reduction of 4-nitrophenol (4-NP) to 4-aminophenol (4-AP) in 1 mmol scale**
- 6. Preparation of Ni-free carbon nanoparticles from NiNPs/C-450**
- 7. Figures S1 – S11**
- 8. Tables S1 – S5**
- 9. Original <sup>1</sup>H NMR, <sup>13</sup>C NMR, TOF-Mass, ESI-Mass, and IR spectra of HL and compounds 1 – 4**

## 1. Synthetic procedures of the ligand and compounds 1 – 4

### Materials

The ligand (5-(4-(tert-butyl)phenyl)pyridine-2-yl)methanol (HL) was prepared according to the literature method.<sup>1</sup> Other chemicals and reagents were obtained from commercial sources and used without further purification. IR spectra (KBr disk, 400–4000  $\text{cm}^{-1}$ ) were recorded on a Perkin-Elmer 1320 spectrometer. Elemental analyses for C, H and N were carried out on a Carlo-Erba CHNO-S microanalyzer. A BTF-1200C-S quartz tube furnace was employed for carbonization. Thermogravimetric analysis (TGA) was performed with a Mettler Toledo Star system (heating rate of 5  $^{\circ}\text{C}\cdot\text{min}^{-1}$ ). The powder X-ray diffraction (PXRD) measurements were carried out on a PANalytical X'Pert PRO MPD system (PW3040/60). UV-vis absorption spectra were obtained on a Varian Cary-50 UV-visible spectrophotometer.  $^1\text{H}$  and  $^{13}\text{C}$  NMR spectra in DMSO were recorded at r.t. on a Varian UNITY plus-400 spectrometer and chemical shifts are referenced to residual DMSO (2.50 ppm for  $^1\text{H}$  and 39.5 ppm for  $^{13}\text{C}$ ). High-resolution mass spectra (HRMS-ESI) were obtained on a Micro<sup>TM</sup> or a Micro YA263 Q-TOF mass spectrometer. Melting points were recorded on a Mel-Temp II apparatus. Transmission electron microscopy (TEM) was carried out on a HITACHI HT-7700 electron microscope operated at 120 kV. High-resolution transmission electron microscopy (HRTEM) was performed on an FEI Tecnai G20 electron microscope operated at 200 kV. X-ray photoelectron spectroscopy (XPS) was accomplished using an SSI S-Probe XPS spectrometer. Raman spectra were obtained on a Confocal LabRAM HR800 spectrometer with a laser excitation wavelength of 632.8 nm. Magnetic measurements were performed on an MPMS-SQUID-VSM system at 300 K. The porosity measurements were performed on Belsorp surface area and porosity analysis instrument at 77 K. The Brunauer-Emmett-Teller (BET) method was utilized to calculate the specific surface areas. All samples were degassed at 150  $^{\circ}\text{C}$  for 12 h before the measurement.

### Synthesis of methyl 5-(4-(tert-butyl)phenyl)picolinate

4-tert-Butylphenylboronic acid (534 mg, 3 mmol), 5-bromopyridine-2-carboxylic acid

methylester (432 mg, 2 mmol) and  $\text{K}_2\text{CO}_3$  (552 mg, 4 mmol) were mixed together in a 50 mL double-necked flask and  $\text{Pd}(\text{PPh}_3)_4$  (46 mg, 0.04 mmol, 2 mol %) was then quickly added. The air in the flask was exchanged with  $\text{N}_2$  three times followed by addition of 10 mL degassed toluene. The resulting mixture was heated at 110 °C for 48 h under an  $\text{N}_2$  atmosphere. Toluene was then removed under reduced pressure. The resulting dark brown mixture was extracted with brine and ethyl acetate 3 times and the organic layers combined and dried over anhydrous  $\text{Na}_2\text{SO}_4$ . The solvent was evaporated and the resulting brown residue purified on a silica column with n-hexane/ethyl acetate ( $v/v = 6:1$ ,  $R_f = 0.33$ ) to yield the title compound as a fine yellow powder. Yield: 510 mg (94 %). Anal. calcd (%) for  $\text{C}_{17}\text{H}_{19}\text{NO}_2$ : C 75.79, H 7.06, N 5.20; found: C 75.63, H 7.16, N 5.07. m.p.: 135.5 – 136.2 °C. HRMS (ESI-TOF)  $m/z$ : Calcd. for  $\text{C}_{17}\text{H}_{20}\text{NO}_2$   $[\text{M} + \text{H}]^+$ : 270.1416, found: 270.1498. IR (KBr disc): 2955(s), 1739(s), 1515(m), 1398(w), 1372(s), 1236(m), 1190(m), 1140(s), 1515(m), 1116(s), 832(s), 797(s), 770(w), 743(w).  $^1\text{H}$  NMR ( $\text{DMSO}-d_6$ , 400 MHz):  $\delta$  9.12 (s, 1H), 8.35 (d,  $J = 8.1$  Hz, 1H), 8.20 (d,  $J = 8.1$  Hz, 1H), 7.83 (d,  $J = 8.1$  Hz, 2H), 7.65 (d,  $J = 8.1$  Hz, 2H), 3.99 (s, 3H), 1.41 (s, 9H) ppm.  $^{13}\text{C}$  NMR ( $\text{DMSO}-d_6$ , 101 MHz):  $\delta$  165.1, 151.6, 147.7, 145.9, 138.4, 134.8, 133.0, 126.9, 126.1, 125.0, 52.4, 34.4, 31.0 ppm.

### Synthesis of (5-(4-(tert-butyl)phenyl)pyridine-2-yl)methanol (HL)

Absolute EtOH (100 mL) was added to a 150 mL triple-necked flask in an ice bath and degassed with  $\text{N}_2$  for 30 minutes. Methyl 5-(4-(tert-butyl)phenyl)picolinate (807 mg, 3 mmol) and  $\text{NaBH}_4$  (91 mg, 2.4 mmol) were then added in sequence with stirring, followed by portion-wise addition of  $\text{CaCl}_2$  (333 mg, 3 mmol) over 5 minutes. The reaction was placed in ice bath for 5 h and monitored with thin-layer chromatography. The reaction was quenched with concentrated  $\text{H}_2\text{SO}_4$  by adjusting the pH value to 3 – 4 and left to stand overnight at r.t. before filtration. The solid residue was extracted with absolute EtOH. The combined EtOH extracts were evaporated to obtain a white solid that was dissolved in brine and further extracted three time with  $\text{CH}_2\text{Cl}_2$ . The organic layers were combined and dried over anhydrous  $\text{Na}_2\text{SO}_4$ . Evaporation of the solvent

provided a white powder that was purified by silica gel column chromatography with petroleum ether/ethyl acetate ( $v/v = 2:1$ ,  $R_f = 0.41$ ) to yield the title compound as a fine white powder. Yield: 300 mg (41 %). Anal. calcd (%) for  $C_{16}H_{19}NO$ : C 79.62, H 7.88, N 5.81; found: C 78.59, H 7.86, N 5.67. m.p.: 142.9 – 143.5 °C. HRMS (ESI-TOF)  $m/z$ : Calcd. for  $C_{16}H_{20}NO$   $[M + H]^+$ : 242.1467, found: 242.1550. IR (KBr disc): 3372(w), 2920(w), 1524(w), 1456(m), 1336(s), 1259(m), 1215(m), 848(w), 826(s), 747(w), 718(w).  $^1H$  NMR (DMSO- $d_6$ , 400 MHz):  $\delta$  8.77 (s, 1H), 8.05 (d,  $J = 8.0$  Hz, 1H), 7.64 (d,  $J = 8.2$  Hz, 2H), 7.52 (t, 3H,  $J = 9.2$  Hz), 5.45 (t,  $J = 5.8$  Hz, 1H), 4.60 (d,  $J = 5.8$  Hz, 2H), 1.31 (s, 9H) ppm.  $^{13}C$  NMR (DMSO- $d_6$ , 101 MHz):  $\delta$  160.6, 150.4, 146.4, 134.3, 134.3, 133.6, 126.4, 125.9, 120.2, 64.1, 34.3, 31.1 ppm.

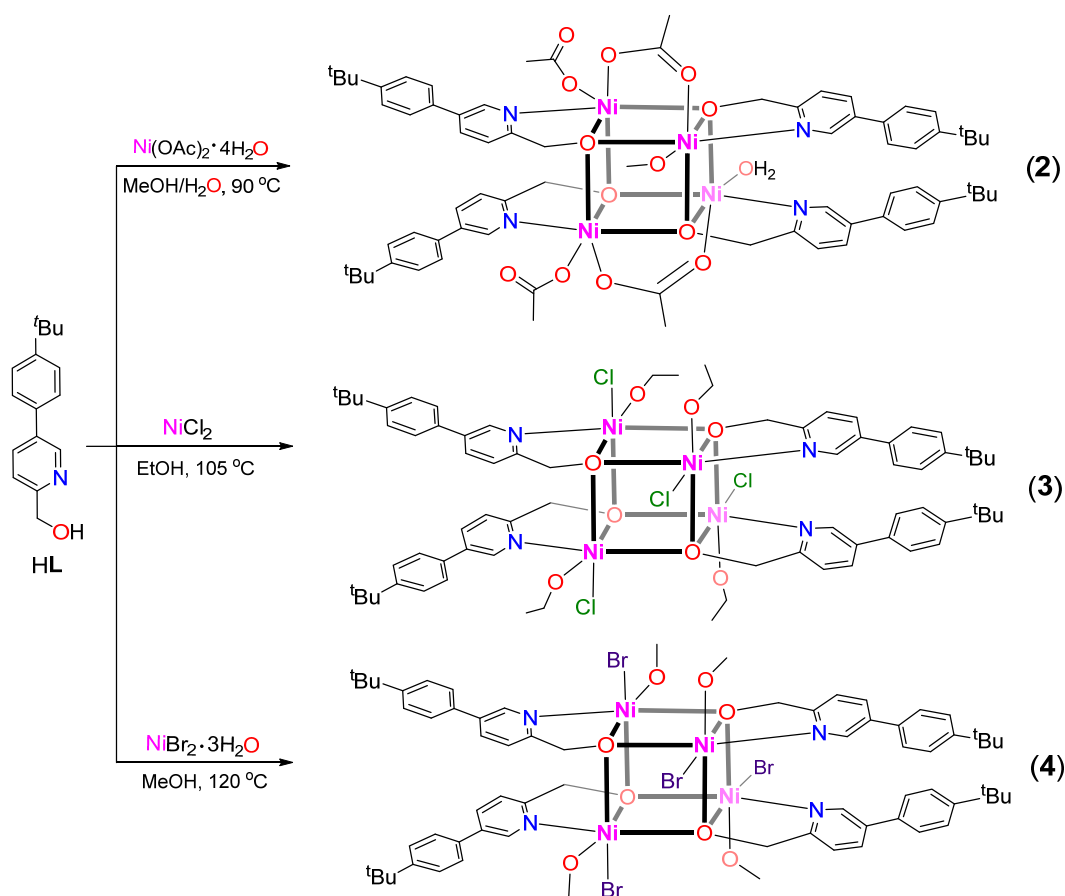

**Scheme S1.** Synthesis of compounds **2** – **4** from Ni salts and HL.

#### Synthesis of $[Ni_4L_4(\mu-HCOO)_2(HCOO)_2(H_2O)_2] \cdot H_2O$ (**1**)

A mixture of  $Ni(NO_3)_2 \cdot 6H_2O$  (60 mg, 0.2 mmol) and HL (24 mg, 0.1 mmol) in 10 mL DMF/ $H_2O$  ( $v/v = 1:1$ ) solvent was placed in a pressure tube. The tube was sealed

and heated at 120 °C for 72 h, followed by smooth cooling to r.t. over 48 h. Green block crystals of **1** were collected by filtration, washed with Et<sub>2</sub>O and dried in air. Yield: 24 mg (67.13 % based on HL). Anal. calcd (%) for C<sub>68</sub>H<sub>84</sub>N<sub>4</sub>Ni<sub>4</sub>O<sub>14</sub>: C 57.05, H 5.87, N 3.91; found: C 57.04, H 5.95, N 4.10. IR (KBr disc, cm<sup>-1</sup>): 3412(s), 3030(w), 1615(s), 1578(s), 1447(w), 1382(m), 1270(w), 1231(w), 1201(w), 1043(w), 815(m), 777(w), 742(w). ESI-MS m/z: Calcd. for [Ni<sub>4</sub>L<sub>4</sub>(HCOO)<sub>3</sub>]<sup>+</sup>: 1329.29, found: 1329.15 (Fig. S4a). Correct assignment of the protons from the <sup>1</sup>H NMR (Fig. S21) cannot be done due the paramagnetic nature of the product.

### Synthesis of [Ni<sub>4</sub>L<sub>4</sub>(μ-OAc)<sub>2</sub>(OAc)<sub>2</sub>(H<sub>2</sub>O)(MeOH)]·2H<sub>2</sub>O·2MeOH (**2**)

Ni(OAc)<sub>2</sub>·4H<sub>2</sub>O (25 mg, 0.1 mmol) and HL (24 mg, 0.1 mmol) were dissolved in a 10 mL MeOH/H<sub>2</sub>O mixed solvent (v / v = 1 : 1). The reactants were sealed in a pressure tube, heated at 90 °C for 72 h, followed by smooth cooling to r.t. over 48 h. Green block crystals were washed with cold MeOH/H<sub>2</sub>O (v / v = 1 : 1) and dried overnight in air. Yield: 20 mg (50.55 % based on Ni). Anal. calcd (%) for C<sub>150</sub>H<sub>204</sub>N<sub>8</sub>Ni<sub>8</sub>O<sub>36</sub>: C 56.87, H 6.45, N 3.54; found: C 56.55, H 6.48, N 3.87. IR (KBr disk, cm<sup>-1</sup>): 3424(s), 2964(m), 1571(s), 1414(s), 1384(s), 1293(m), 1270(w), 1114(s), 1045(m), 820(m), 760(w), 728(w). ESI-MS m/z: Calcd. for [Ni<sub>4</sub>L<sub>4</sub>(OAc)<sub>2</sub>(OH)]<sup>+</sup>: 1329.32, found: 1329.16 (Fig. S4b). Correct assignment of the protons from the <sup>1</sup>H NMR (Fig. S22) cannot be done due the paramagnetic nature of the product.

### Synthesis of [Ni<sub>4</sub>L<sub>4</sub>(EtOH)<sub>4</sub>Cl<sub>4</sub>] (**3**)

NiCl<sub>2</sub> (26 mg, 0.1 mmol), HL (48 mg, 0.2 mmol) and sodium butyrate (22 mg, 0.2 mmol) were dissolved in 10 mL EtOH. The clear green liquid was sealed in a pressure tube, heated at 105 °C for 72 h followed by smooth cooling to r.t. over 48 h. Green crystals were collected by filtration, washed with a small quantity of EtOH and dried in air. Yield: 12 mg (31.37 % based on Ni). Anal. calcd (%) for C<sub>72</sub>H<sub>96</sub>Cl<sub>4</sub>N<sub>4</sub>Ni<sub>4</sub>O<sub>8</sub>: C 56.76, H 6.31, N 3.68; found: C 56.25, H 6.45, N 3.60. IR (KBr disk, cm<sup>-1</sup>): 3424(s), 2962(s), 1613(m), 1399(s), 1384(s), 1293(w), 1270(w), 1045(s), 821(m), 729(w), 728(w). ESI-MS m/z: Calcd. for {[Ni<sub>4</sub>L<sub>4</sub>Cl<sub>4</sub>(EtOH)<sub>5</sub>(H<sub>2</sub>O)<sub>3</sub>] + 2H<sup>+</sup>}<sup>2+</sup>: 811.71, found:

811.73 (Fig. S4c). Correct assignment of the protons from the  $^1\text{H}$  NMR (Fig. S23) cannot be done due the paramagnetic nature of the product.

### Synthesis of $[\text{Ni}_4\text{L}_4(\text{MeOH})_4\text{Br}_4]$ (**4**)

$\text{NiBr}_2 \cdot 3\text{H}_2\text{O}$  (55 mg, 0.2 mmol) and **HL** (48 mg, 0.2 mmol) was dissolved in 10 mL of MeOH. The green clear solution was sealed in a pressure tube, heated at 120 °C for 72 h before smooth cooling to r.t. over 48 h. Green crystals were collected by filtration, washed with a small quantity of MeOH and dried in air. Yield: 31 mg (37.80 % based on Ni). Anal. calcd (%) for  $\text{C}_{63}\text{H}_{88}\text{N}_4\text{Ni}_4\text{O}_8$ : C 46.10, H 5.35, N 3.42; found: C 45.90, H 5.31, N 3.44. IR (KBr disk,  $\text{cm}^{-1}$ ): 3423(s), 3031(w), 1610(m), 1447(w), 1384(m), 1363(m), 1236(w), 1236(w), 1045(s), 821(m), 743(w), 728(w). ESI-MS  $m/z$ : Calcd. for  $\{[\text{Ni}_2\text{L}_2\text{Br}_3(\text{MeOH})(\text{DMF})_2(\text{H}_2\text{O})] + 2\text{H}^+\}^+$ : 1033.06, found: 1032.83 (Fig. S4d). Correct assignment of the protons from the  $^1\text{H}$  NMR (Fig. S24) cannot be done due the paramagnetic nature of the product.

### Synthetic procedure for NiNPs/C

In a typical experiment, compound **1** was added to a ceramic boat and carefully loaded into a quartz tube furnace. The sample was subjected to a smooth flow of  $\text{N}_2$  for 30 minutes to remove  $\text{O}_2$  and moisture. This  $\text{N}_2$  flow was turned down during heating. The sample was heated from r.t. to T ( $T = 450\text{ }^\circ\text{C}$ ,  $500\text{ }^\circ\text{C}$ ,  $550\text{ }^\circ\text{C}$  and  $600\text{ }^\circ\text{C}$ ) at a heating rate of  $1\text{ }^\circ\text{C} \cdot \text{min}^{-1}$  and maintained at T for 3 h before evenly cooling to r.t. in a flow of  $\text{N}_2$ . The black sample obtained was denoted as NiNPs/C-T.

## 2. X-ray structure determination for **1** - **4**

All measurements were made on a Bruker D8-Quest (**2**, **3** and **4**) and an Agilent Xcalibur (**1**) CCD X-ray diffractometer using an enhanced X-ray source Mo  $\text{K}\alpha$  ( $\lambda = 0.71073\text{ \AA}$ ). Each single crystal was mounted at the top of a glass fiber with grease in a stream of  $\text{N}_2$ . Cell parameters were refined using the programs Bruker SAINT (for **2**, **3** and **4**) and *CrysAlisPro* (Agilent Technologies, Ver. 1.171.35.21, 2012) (for **1**). Absorption corrections (multi-scan) were applied.<sup>2</sup> All crystal structures were solved

by direct methods and refined on F<sub>2</sub> by full-matrix least-squares methods with the SHELXTL-2013 program.<sup>3</sup> The tert-butyl groups in the **L** ligands of **1** displayed rotational disorder with the relative ratios of 0.70/0.30, 0.62/0.38, 0.29/0.71 and 0.30/0.70 refined for the two components. The locations of the hydrogen atoms on the water molecules were suggested by the Calc-OH program in the WinGX suite<sup>4</sup> and their O–H distances further restrained to O–H = 0.83 Å with thermal parameters constrained to  $U_{\text{iso}}(\text{H}) = 1.2U_{\text{eq}}(\text{O})$ . The location of the two hydrogen atoms on the coordinated EtOH in **3** were suggested by the Calc-OH program in the WinGX suite.<sup>4</sup> Their coordinates were subsequently fixed and thermal parameters constrained to  $U_{\text{iso}}(\text{H}) = 1.2U_{\text{eq}}(\text{O})$ . For **4**, part of the two **L** ligands displayed conformational disorder with the relative ratios of 0.42/0.58 and 0.62/0.38 for the two components. Some amount of spatially delocalized electron density in the lattice of **2** – **4** was found but acceptable refinement results could not be obtained. The solvent contribution was then modeled using SQUEEZE in the Platon program suite.<sup>5</sup> Crystallographic data have been deposited with the Cambridge Crystallographic Data Center (CCDC) (1536067 – 1536070). These data can be either obtained free of charge from the CCDC via [www.ccdc.cam.ac.uk/data\\_request/cif](http://www.ccdc.cam.ac.uk/data_request/cif) or from the Electronic Supplementary Information (ESI). A summary of crystal data and structure refinement parameters of **1** – **4** are given in Table S1 and the selected bond lengths and angles are listed in Table S2.

### 3. Structural discussion of **2** – **4**

The cuboidal [Ni<sub>4</sub>O<sub>4</sub>] skeleton, the relative arrangement of the four **L** ligands, as well as the bridging acetate of **2** (Fig. S1a) resemble that of **1**. There are, however, notable differences of the two structures. For example, although there are two additional monodentate acetate ligands in **2** (versus formate in **1**), these acetate ligands locate within the side plane of the cubane which supports two staggered **L** ligands (versus two monodentate formates in **1** located at the base plane of the cubane). As a consequence, one additional aqua ligand and MeOH ligand coordinated to the two Ni centers within the other side plane of the cubane (versus two aqua ligands in **1**

coordinated to the two Ni centers at the upper plane of the cubane).

Compounds **3** (Fig. S1b) and **4** (Fig. S1c) are structurally similar and only differ in coordination solvates (EtOH in **3** and MeOH in **4**) and outside donor (Cl in **3** and Br in **4**). Take the structure of **3** as an example, all the four Ni centers adopt the same coordination environment and are associated by three  $\mu_3$ -O atoms in three orthogonal vectors from three **L** ligands. Its octahedral coordination is filled by one N atom (from one of the three **L** ligands), one terminal Cl<sup>-</sup> and one EtOH solvate. It is notable that although compounds **1** and **2**, **3** and **4** share similar Ni<sub>4</sub>O<sub>4</sub> cluster skeletons, they represent two structural types. A pair of **L** ligands on each of the opposite cuboidal faces exhibit a staggered conformation and these **L** pairs have different orientations. In **1** and **2**, the two **L** ligand pairs are nearly parallel while in **3** and **4**, the two **L** ligand pairs are roughly orthogonal. The Ni···Ni separations for **2** (2.9251(4) – 3.2081(4) Å), **3** (3.0804(11) – 3.1818(11) Å) and **4** (3.1048(17) – 3.1628(16) Å) are comparable to those found in **1** (2.8896(7) – 3.1982(7) Å). While the Ni- $\mu_3$ -O distances for **2** (2.0352(13) – 2.0820(13) Å), **3** (2.039(3) – 2.116(5) Å) and **4** (2.037(7) – 2.119(7) Å) are also similar to those found in **1** (2.043(2) – 2.090(2) Å). Further structural analysis revealed intramolecular hydrogen bonding between coordinated water and monodenate carboxylate (**1**), MeOH and monodenate carboxylate (**2**), EtOH and Cl (**3**), and MeOH and Br (**4**) (Table S3), which may partly explain the formation of such different cuboidal structural types.

#### **4. Procedure for the reduction of 4-nitrophenol (4-NP) to 4-aminophenol (4-AP) monitored by UV-vis**

NiNPs/C-T (2 mg) and water (2.05 mL) were added into in a 4.5 mL glass vial and ultra-sonicated for a few minutes to form a suspension. 4-NP (0.3 mL, 1 mM) was added and the light yellow mixture stirred for several minutes (800 rpm) at 20 °C. This light yellow solution immediately became deep yellow upon introducing an aqueous NaBH<sub>4</sub> solution (0.65 mL, 0.2 M) and then gradually became colorless. The conversion process was monitored by UV-vis spectroscopy. The catalyst was separated with a magnet and rinsed with water for subsequent runs.



## 5. Procedure for the reduction of 4-nitrophenol (4-NP) to 4-aminophenol (4-AP) in 1 mmol scale

4-NP (139 mg, 1 mmol) was slowly dissolved in 4 mL of water, and an additional 2 mL water solution containing NaBH<sub>4</sub> (227 mg, 6 mmol) solution was added before adding solid NiNPs/C-450 (10 mg). The mixture stirred for 2 h (800 rpm) at 20 °C. The conversion process was monitored by thin layer chromatography (TLC) and the resulting dark brown mixture extracted with ethyl acetate for 3 times. The organic layer was combined and dried over anhydrous Na<sub>2</sub>SO<sub>4</sub>. Evaporation of the solvent and purified by silica gel column chromatography with petroleum ether/ethyl acetate ( $v/v = 1:1$ ,  $R_f = 0.53$ ) yielded 4-AP. Yield: 104.20 mg (95.60 %).

## 6. Preparation of Ni-free carbon nanoparticles from NiNPs/C-450

40 mg NiNPs/C-450 was mixed with 40 mL HCl (10 M) and the mixture kept stirring overnight at 90 °C. The black solid was filtered off, repeatedly washed with H<sub>2</sub>O and EtOH before finally dried in an oven.

## 7. Figures S1 – S11

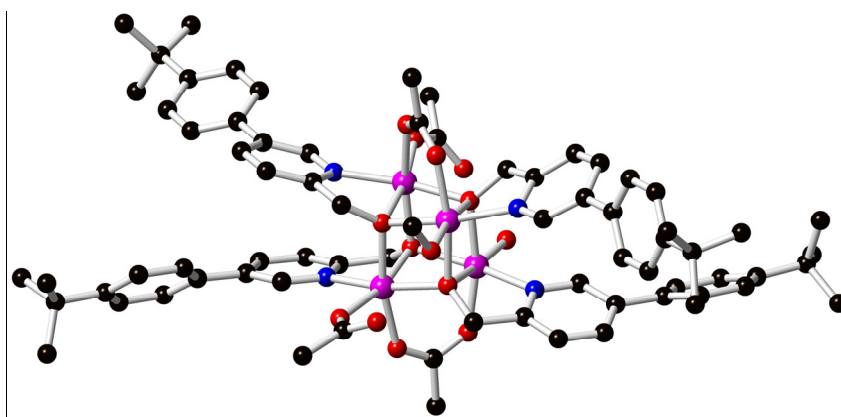

(a)

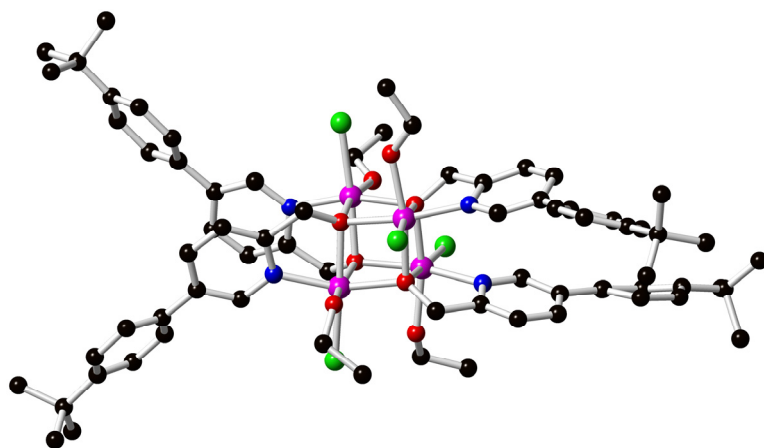

(b)

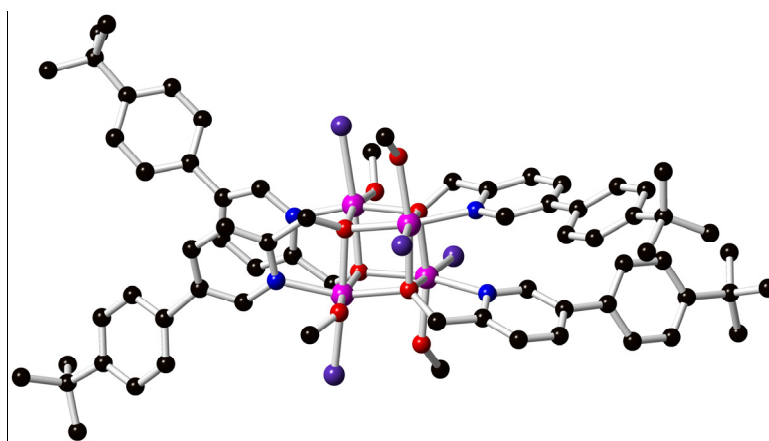

(c)

**Fig. S1** Structures of **2** (a), **3** (b), and **4** (c) with the disordered components, lattice solvates and hydrogen atoms omitted. Color codes: Ni (magenta), O (red), N (blue), C (black), Cl (green), Br (indigo).

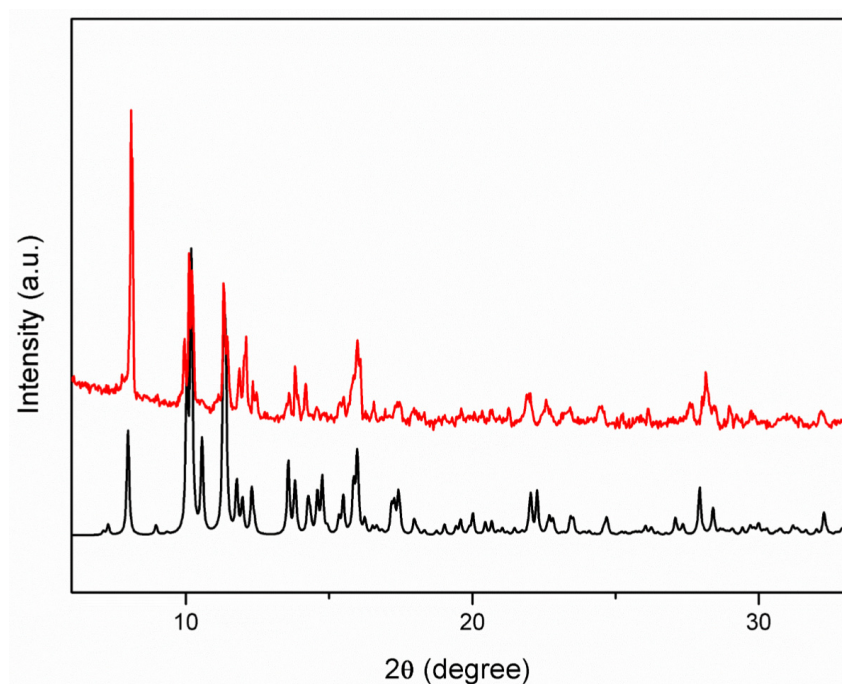

**Fig. S2** PXRD pattern of compound **1** (red) and the simulated PXRD pattern (black).

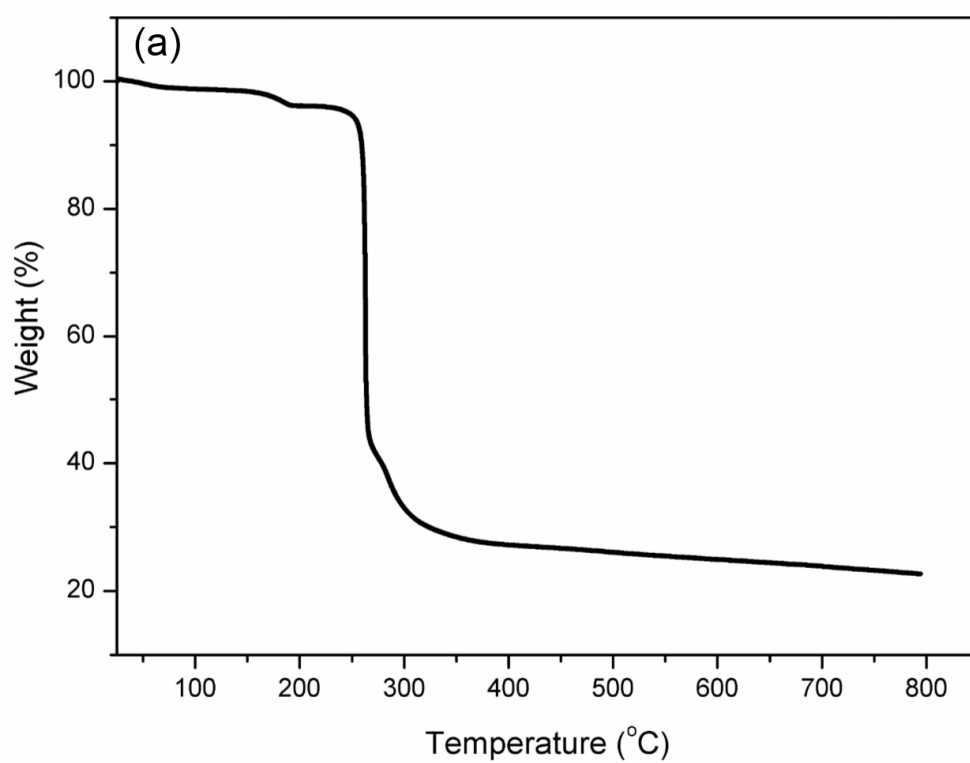

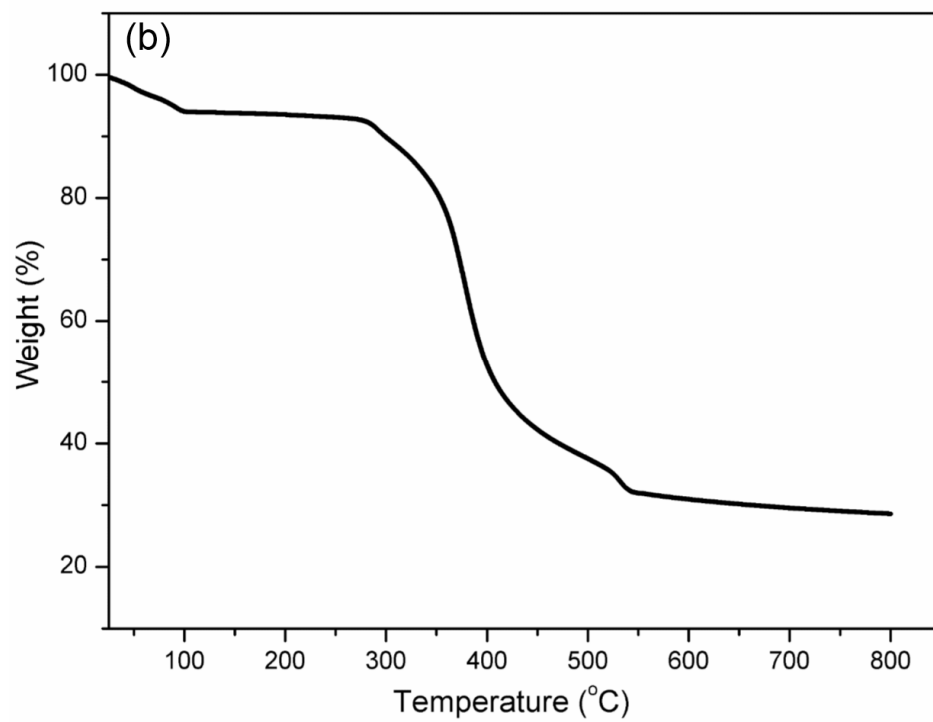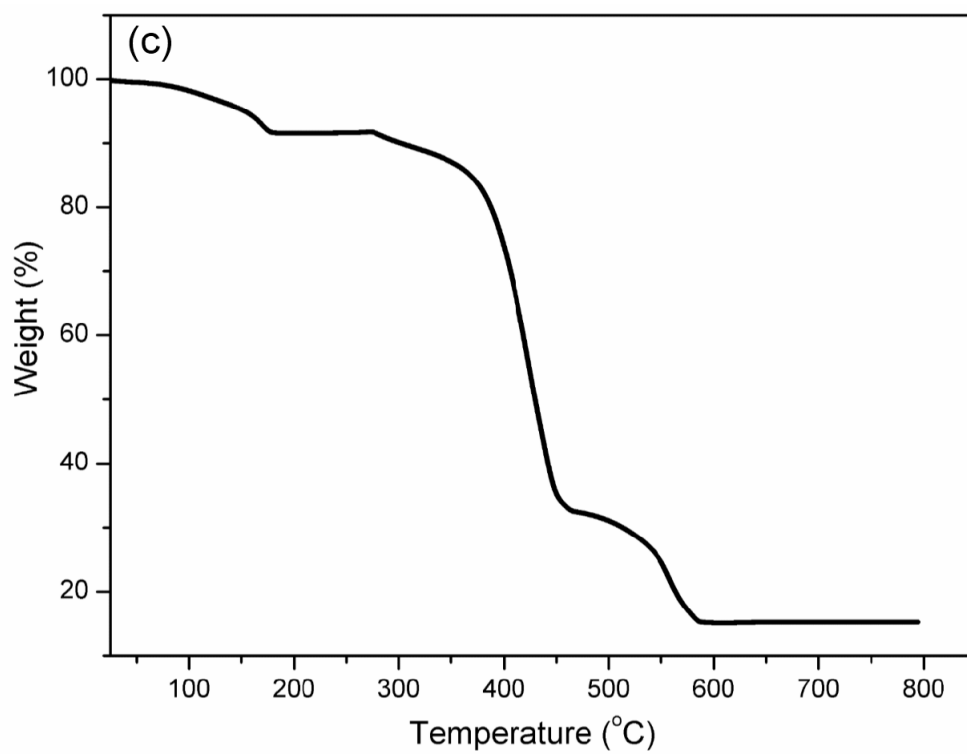

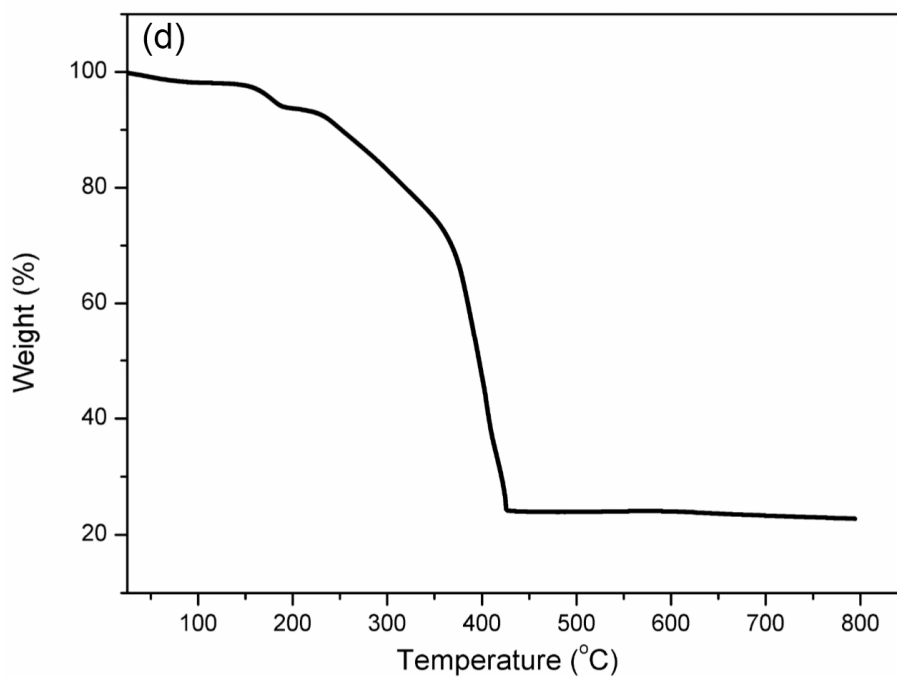

**Fig. S3** TGA of compound **1** (a), **2** (b), **3** (c) and **4** (d) collected under an N<sub>2</sub> atmosphere.

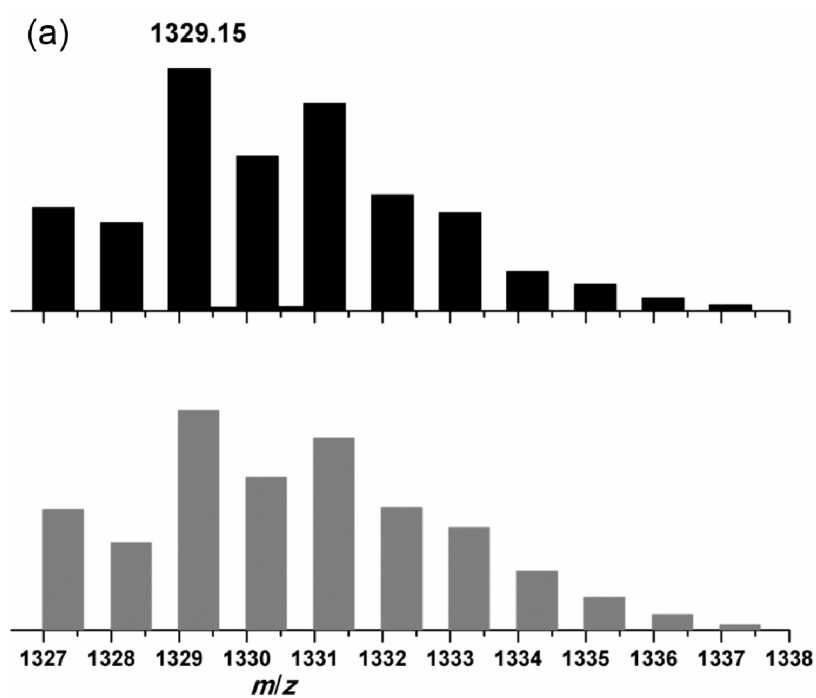

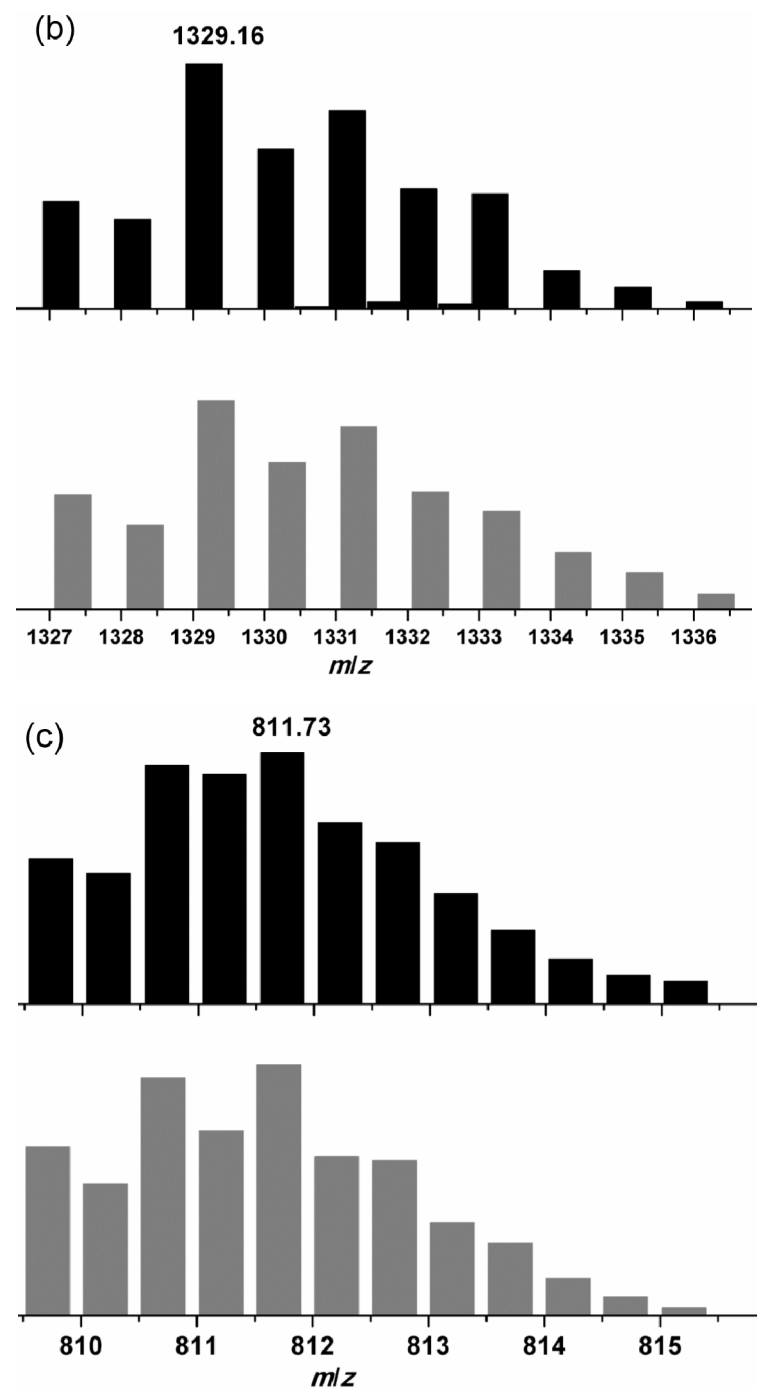

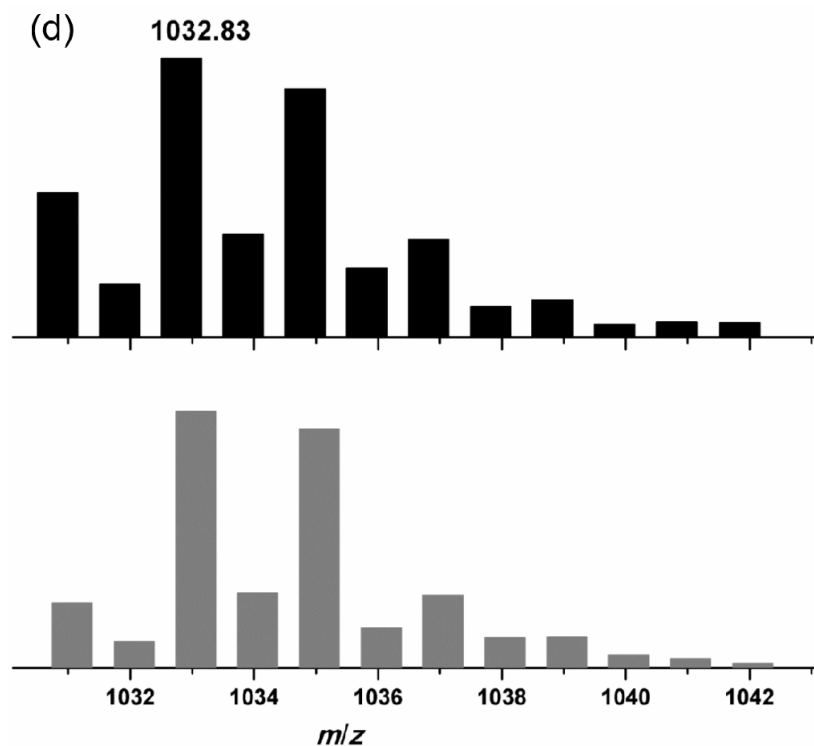

**Fig. S4** The positive-ion ESI mass spectrum (black) and the calculated isotope pattern (gray) of the  $[\text{Ni}_4\text{L}_4(\text{HCOO})_3]^+$  cation of **1** (a). The positive-ion ESI mass spectrum (black) and the calculated isotope pattern (gray) of the  $[\text{Ni}_4\text{L}_4(\text{OAc})_2(\text{OH})]^+$  cation of **2** (b). The positive-ion ESI mass spectrum (black) and the calculated isotope pattern (gray) of the  $\{[\text{Ni}_4\text{L}_4\text{Cl}_4(\text{EtOH})_5(\text{H}_2\text{O})_3] + 2\text{H}^+\}^{2+}$  cation of **3** (c). The positive-ion ESI mass spectrum (black) and the calculated isotope pattern (gray) of the  $\{[\text{Ni}_2\text{L}_2\text{Br}_3(\text{MeOH})(\text{DMF})_2(\text{H}_2\text{O})] + 2\text{H}^+\}^+$  cation of **4** (d).

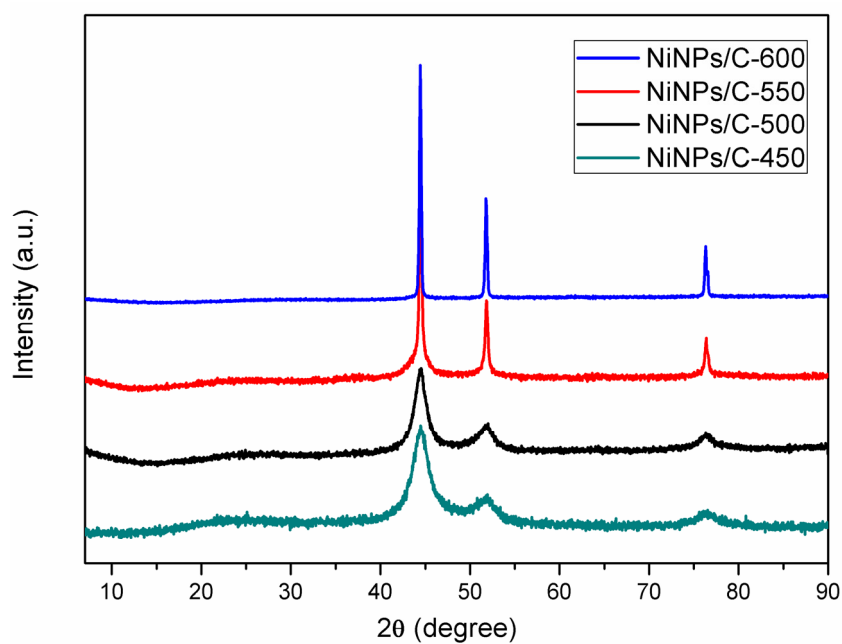

**Fig. S5** PXRd patterns of NiNPs/C-450, NiNPs/C-500, NiNPs/C-550, NiNPs/C-600.

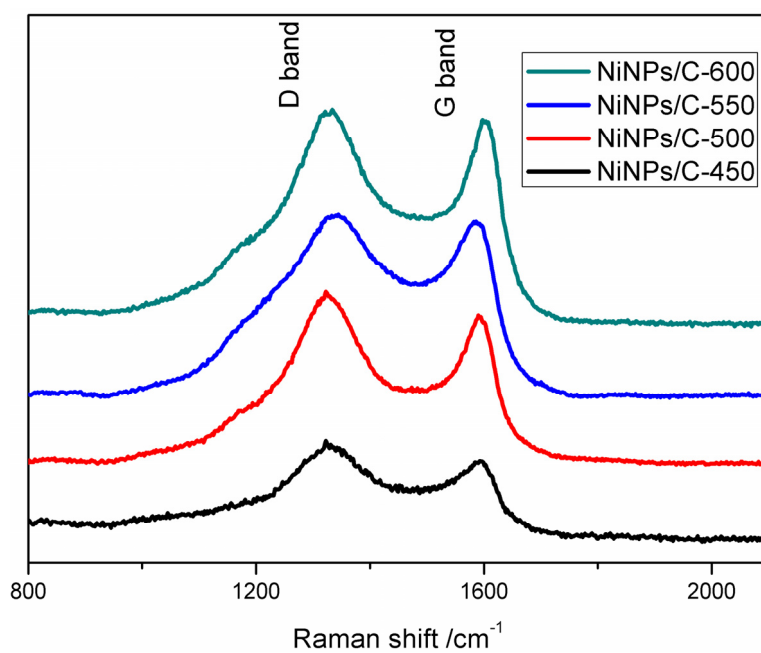

**Fig. S6** Raman spectra of the obtained NiNPs/C-450, NiNPs/C-500, NiNPs/C-550, NiNPs/C-600.



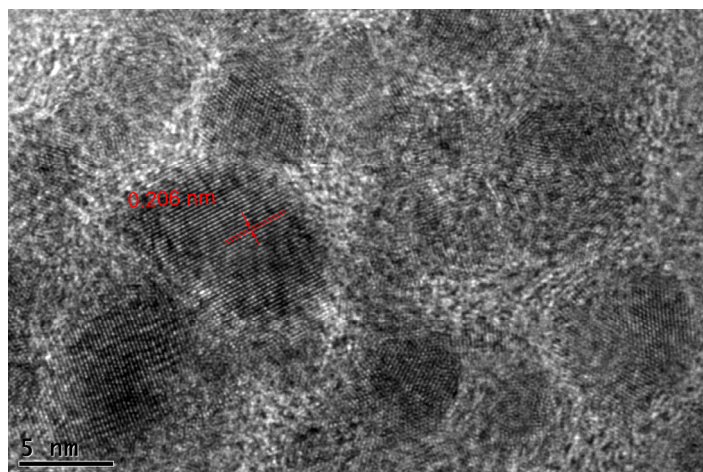

**Fig. S7** HRTEM image of the obtained NiNPs/C-450.

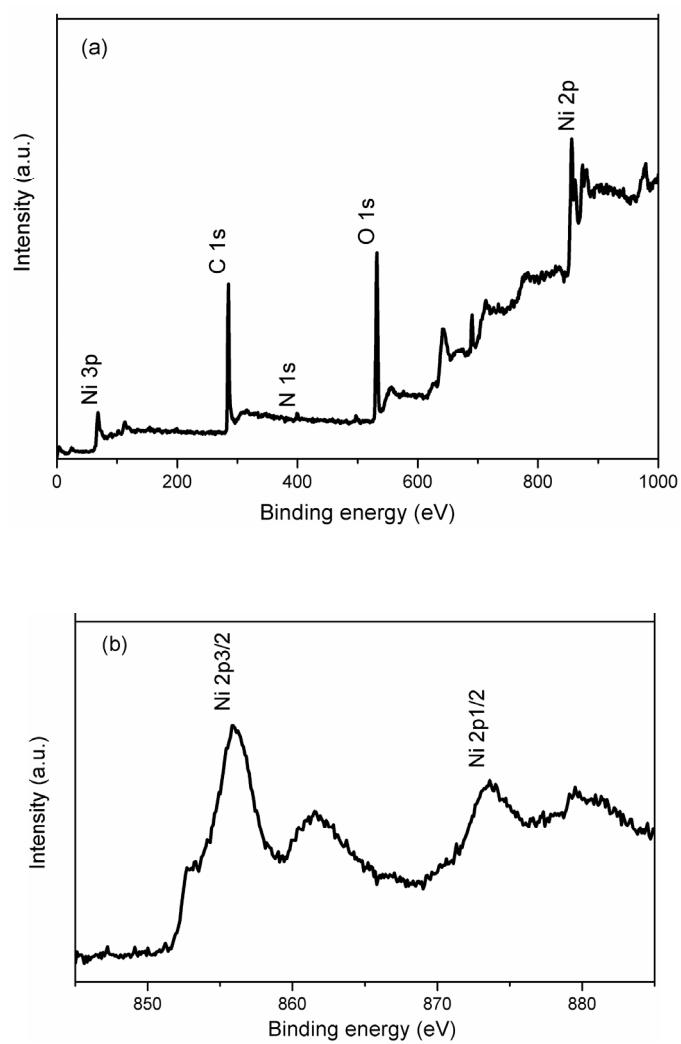

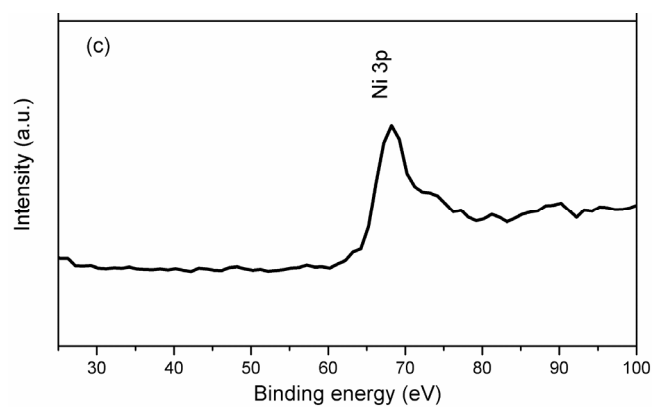

**Fig. S8** XPS spectra of NiNPs/C-450 (a), Ni 2p (b), and Ni 3p (c).

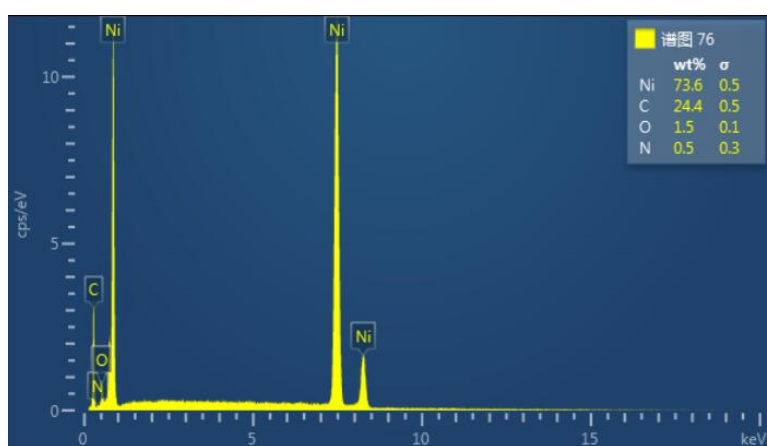

**Fig. S9** The EDX spectrum of NiNPs/C-450.

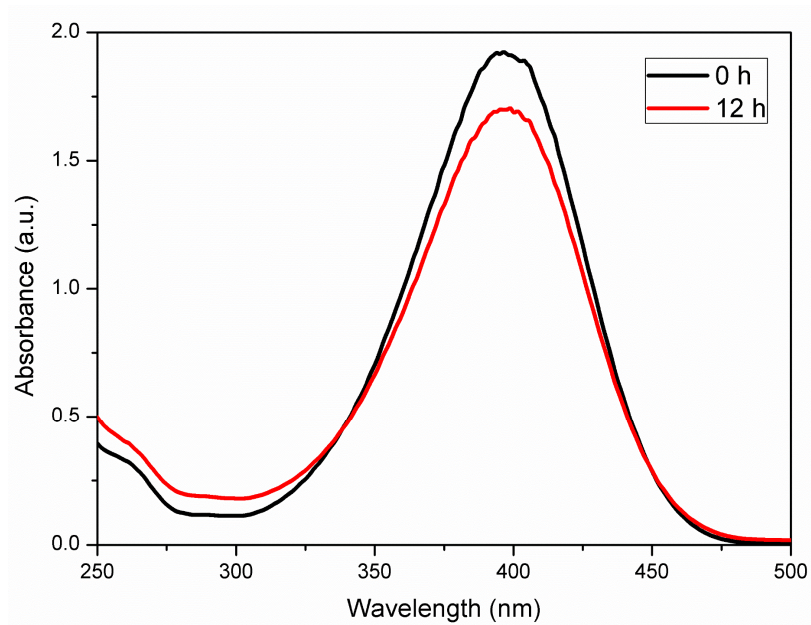

**Fig. S10** UV-vis absorption spectra for the catalytic reduction of 4-NP without adding any catalysts at time zero and after 12 h.

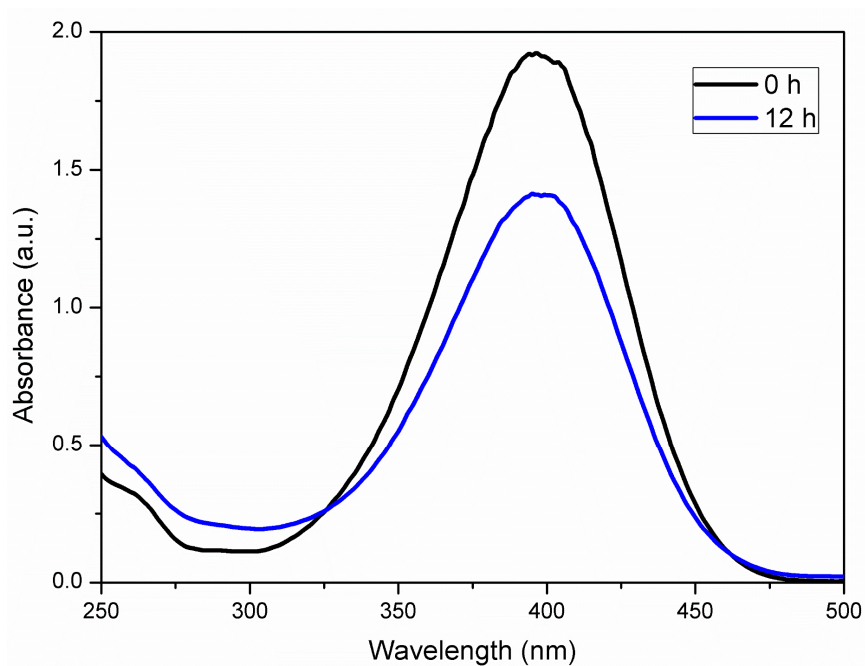

**Fig. S11** UV-vis absorption spectra for the catalytic reduction of 4-NP with compound **1** as a catalyst at time zero and after 12 h.

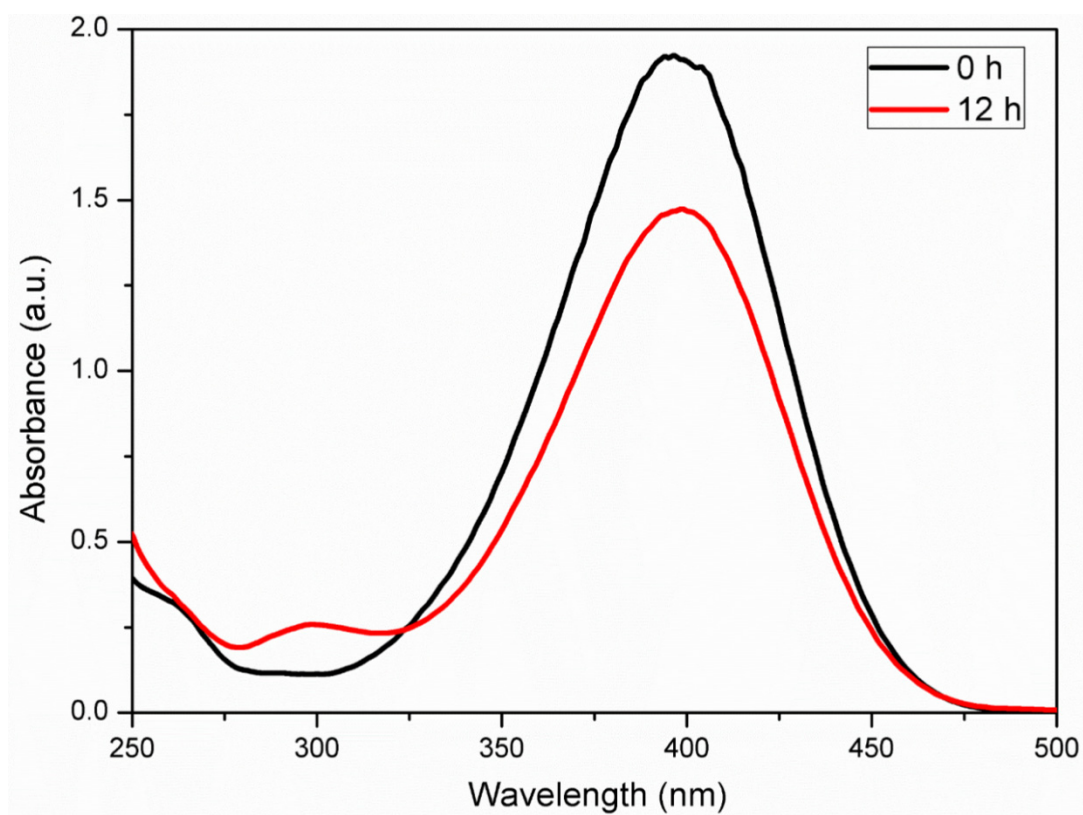

**Fig. S12** UV-vis absorption spectra for the catalytic reduction of 4-NP with metal-free host material as a catalyst at time zero and after 12 h.

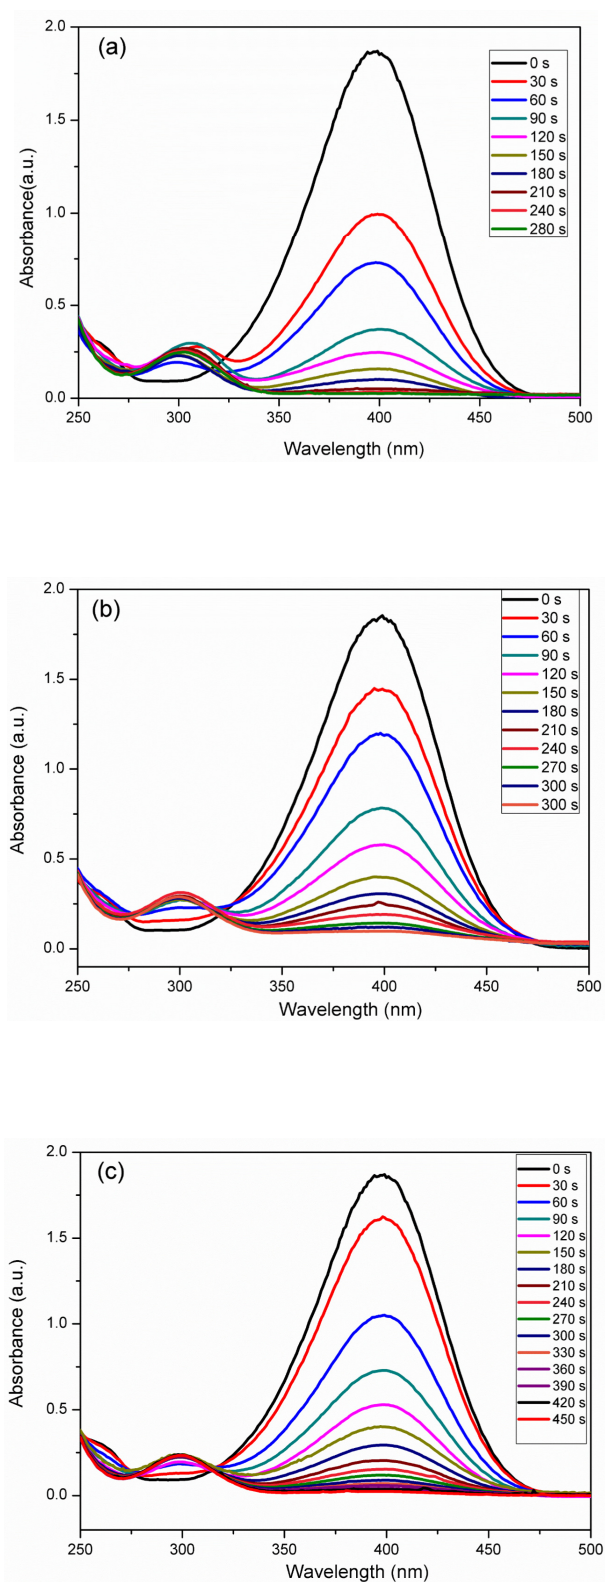

**Fig. S13** UV-vis absorption spectra for the catalytic reduction of 4-NP with NiNPs/C-500 (a), NiNPs/C-550 (b), and NiNPs/C-600 (c).

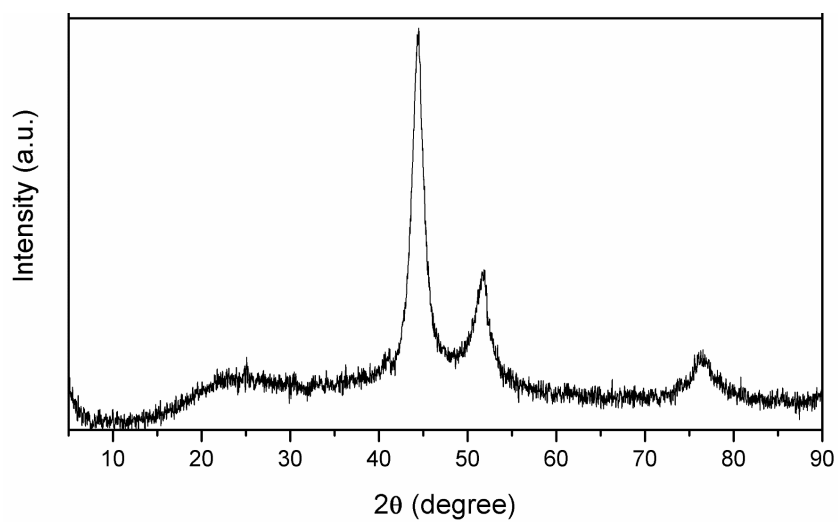

**Fig. S14** PXRD spectrum of NiNPs/C-450 after 10 catalytic cycles.

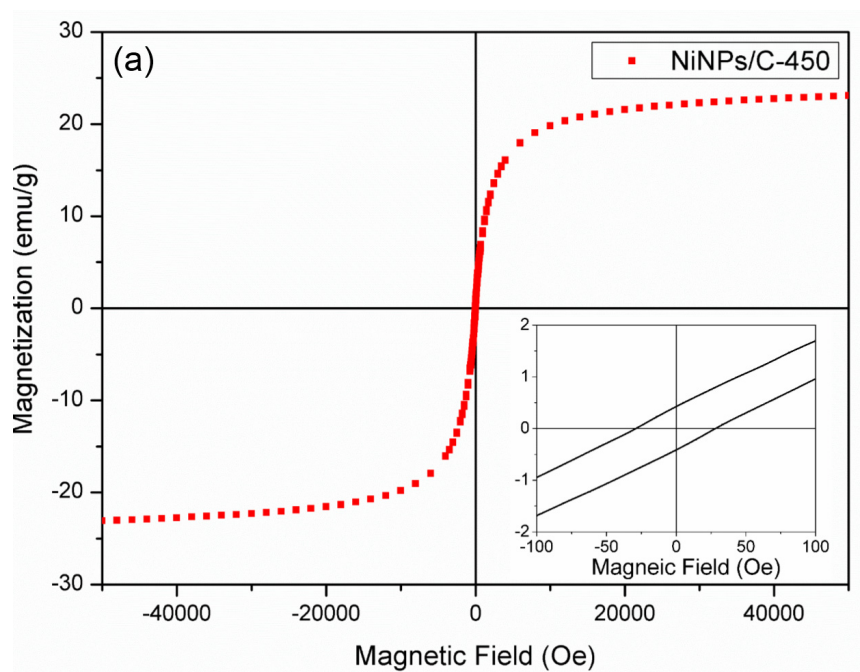



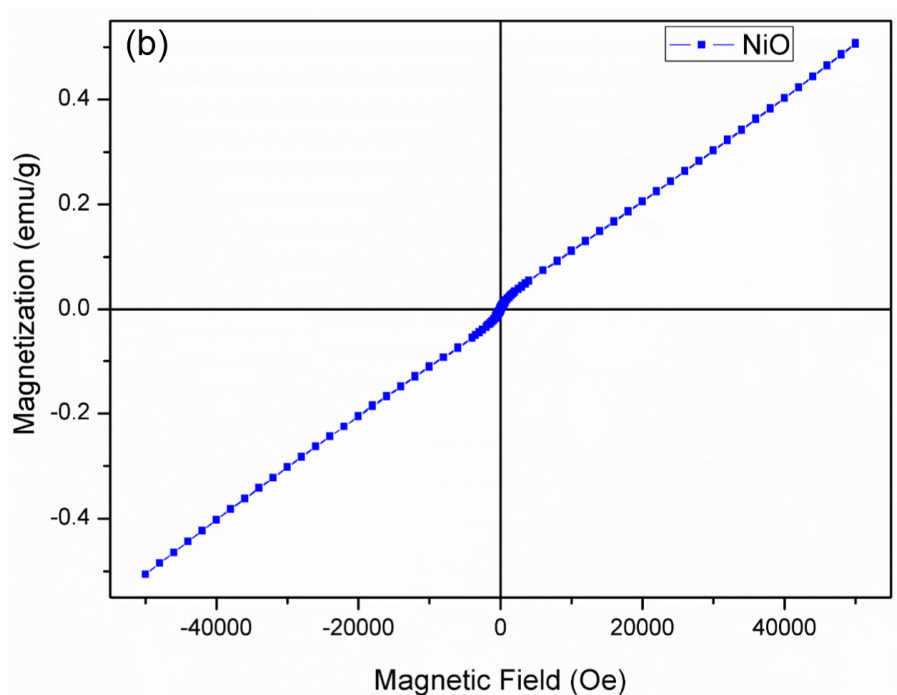

**Fig. S15** The hysteresis loops obtained for NiNPs/C-450 with inset of shows the width of the hysteresis loop near the zero filed (a). The hysteresis loops obtained for NiO (b).

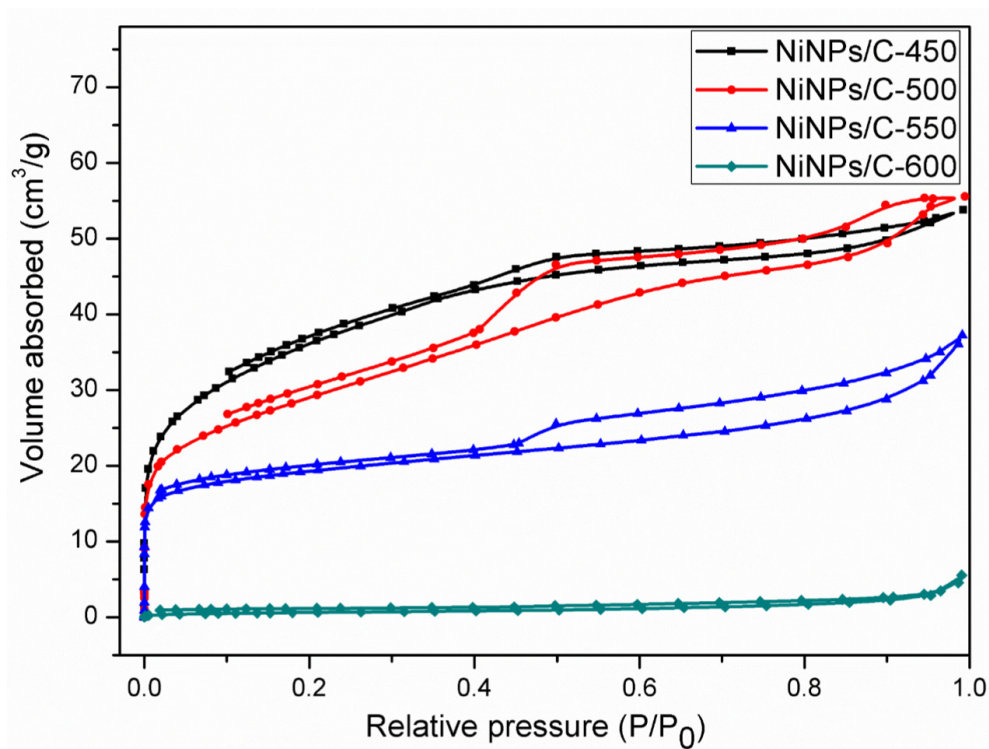

**Fig. S16** N<sub>2</sub> adsorption-desorption isotherms of NiNPs/C-450 (black), NiNPs/C-500 (red), NiNPs/C-550 (blue) and NiNPs/C-600 (olive).

## 8. Tables S1 – S5

**Table S1 Crystal data and structure refinement parameters for 1 – 4**

| Compounds                                    | 1                                                                              | 2                                                                                | 3                                                                                             | 4                                                                                             |
|----------------------------------------------|--------------------------------------------------------------------------------|----------------------------------------------------------------------------------|-----------------------------------------------------------------------------------------------|-----------------------------------------------------------------------------------------------|
| Formula                                      | C <sub>68</sub> H <sub>82</sub> N <sub>4</sub> Ni <sub>4</sub> O <sub>15</sub> | C <sub>150</sub> H <sub>204</sub> N <sub>8</sub> Ni <sub>8</sub> O <sub>36</sub> | C <sub>72</sub> H <sub>96</sub> Cl <sub>4</sub> N <sub>4</sub> Ni <sub>4</sub> O <sub>8</sub> | C <sub>68</sub> H <sub>84</sub> Br <sub>4</sub> N <sub>4</sub> Ni <sub>4</sub> O <sub>8</sub> |
| Formula weight                               | 1430.21                                                                        | 3164.88                                                                          | 1522.16                                                                                       | 1639.87                                                                                       |
| Crystal system                               | triclinic                                                                      | triclinic                                                                        | monoclinic                                                                                    | monoclinic                                                                                    |
| Space group                                  | <i>P</i> $\bar{1}$                                                             | <i>P</i> $\bar{1}$                                                               | <i>C</i> 2/ <i>c</i>                                                                          | <i>C</i> 2/ <i>c</i>                                                                          |
| <i>a</i> /Å                                  | 12.2603(4)                                                                     | 12.3023(11)                                                                      | 30.848(4)                                                                                     | 27.418(3)                                                                                     |
| <i>b</i> /Å                                  | 12.8921(4)                                                                     | 16.2603(14)                                                                      | 16.941(2)                                                                                     | 17.6175 (18)                                                                                  |
| <i>c</i> /Å                                  | 23.0008(8)                                                                     | 22.3585(18)                                                                      | 33.157(4)                                                                                     | 30.949(3)                                                                                     |
| $\alpha$ /°                                  | 76.203(3)                                                                      | 102.451(2)                                                                       | 90                                                                                            | 90                                                                                            |
| $\beta$ /°                                   | 84.493(3)                                                                      | 100.521(2)                                                                       | 104.778(3)                                                                                    | 101.688(2)                                                                                    |
| $\gamma$ /°                                  | 88.665                                                                         | 109.527(2)                                                                       | 90                                                                                            | 90                                                                                            |
| <i>V</i> /Å <sup>3</sup>                     | 3514.3(2)                                                                      | 3955.5(6)                                                                        | 16755(4)                                                                                      | 14640 (2)                                                                                     |
| <i>D</i> <sub>c</sub> /(g cm <sup>-3</sup> ) | 1.352                                                                          | 1.329                                                                            | 1.207                                                                                         | 1.488                                                                                         |
| <i>Z</i>                                     | 2                                                                              | 1                                                                                | 8                                                                                             | 8                                                                                             |
| $\mu$ (Mo–K $\alpha$ )/mm <sup>-1</sup>      | 1.120                                                                          | 1.005                                                                            | 1.061                                                                                         | 3.249                                                                                         |
| <i>F</i> (000)                               | 1500                                                                           | 1672                                                                             | 6400                                                                                          | 6688                                                                                          |
| Total reflections                            | 40873                                                                          | 193877                                                                           | 248890                                                                                        | 136657                                                                                        |
| Unique reflections                           | 18299                                                                          | 19637                                                                            | 20796                                                                                         | 16135                                                                                         |
| No observations                              | 12527                                                                          | 14822                                                                            | 15044                                                                                         | 9629                                                                                          |
| No parameters                                | 850                                                                            | 956                                                                              | 945                                                                                           | 837                                                                                           |
| <i>R</i> <sub>int</sub>                      | 0.0406                                                                         | 0.0556                                                                           | 0.0659                                                                                        | 0.1101                                                                                        |
| <i>R</i> <sup>a</sup>                        | 0.0624                                                                         | 0.0363                                                                           | 0.0955                                                                                        | 0.0869                                                                                        |
| <i>wR</i> <sup>b</sup>                       | 0.1638                                                                         | 0.0777                                                                           | 0.2224                                                                                        | 0.1908                                                                                        |
| <i>GOF</i> <sup>c</sup>                      | 1.071                                                                          | 1.021                                                                            | 1.106                                                                                         | 1.065                                                                                         |

<sup>a</sup>*R* =  $\Sigma ||F_o| - |F_c|| / \Sigma |F_o|$ . <sup>b</sup>*wR* =  $\{\Sigma w(F_o^2 - F_c^2)^2 / \Sigma w(F_o^2)^2\}^{1/2}$ . <sup>c</sup>GOF =  $\{\Sigma w((F_o^2 - F_c^2)^2) / (n - p)\}^{1/2}$ , where *n* = number of reflections and *p* = total number of parameters refined.

**Table S2 Selected bond lengths (Å) and angles (°) for 1 – 4**

| Compound 1  |           |             |           |
|-------------|-----------|-------------|-----------|
| Ni(1)-Ni(3) | 2.9557(7) | Ni(2)-Ni(4) | 2.8895(6) |
| Ni(1)-Ni(2) | 3.1717(6) | Ni(1)-Ni(4) | 3.1789(7) |
| Ni(2)-Ni(3) | 3.1989(6) | Ni(3)-Ni(4) | 3.1519(6) |
| Ni(1)-O(1)  | 2.090(2)  | Ni(1)-O(2)  | 2.086(2)  |
| Ni(1)-O(3)  | 2.043(2)  | Ni(1)-O(6)  | 2.016(3)  |
| Ni(1)-N(1)  | 2.086(3)  | Ni(1)-O(8)  | 2.076(3)  |
| Ni(2)-O(1W) | 2.023(3)  | Ni(2)-O(1)  | 2.058(2)  |
| Ni(2)-O(2)  | 2.055(2)  | Ni(2)-O(4)  | 2.077(3)  |
| Ni(2)-O(11) | 2.071(3)  | Ni(2)-N(2)  | 2.066(3)  |
| Ni(3)-O(10) | 2.039(3)  | Ni(3)-O(1)  | 2.064(3)  |

|                   |            |                   |            |
|-------------------|------------|-------------------|------------|
| Ni(3)-O(7)        | 2.062(3)   | Ni(3)-O(3)        | 2.080(2)   |
| Ni(3)-N(3)        | 2.065(3)   | Ni(3)-O(4)        | 2.085(2)   |
| Ni(4)-O(2W)       | 2.001(3)   | Ni(4)-O(2)        | 2.051(3)   |
| Ni(4)-O(3)        | 2.050(2)   | Ni(4)-O(4)        | 2.069(2)   |
| Ni(4)-N(4)        | 2.065(3)   | Ni(4)-O(12)       | 2.092(3)   |
| O(6)-Ni(1)-O(3)   | 103.40(11) | O(3)-Ni(1)-O(8)   | 91.43(11)  |
| O(6)-Ni(1)-O(8)   | 88.34(11)  | O(3)-Ni(1)-N(1)   | 164.00(11) |
| O(6)-Ni(1)-N(1)   | 92.58(12)  | O(6)-Ni(1)-O(2)   | 100.23(10) |
| O(8)-Ni(1)-N(1)   | 88.21(12)  | O(8)-Ni(1)-O(2)   | 168.04(11) |
| O(3)-Ni(1)-O(2)   | 78.53(10)  | O(6)-Ni(1)-O(1)   | 170.80(12) |
| N(1)-Ni(1)-O(2)   | 99.62(11)  | O(8)-Ni(1)-O(1)   | 93.55(10)  |
| O(3)-Ni(1)-O(1)   | 85.57(10)  | O(2)-Ni(1)-O(1)   | 79.32(9)   |
| N(1)-Ni(1)-O(1)   | 78.49(11)  | O(1W)-Ni(2)-O(1)  | 91.39(10)  |
| O(1W)-Ni(2)-O(2)  | 170.05(12) | O(1W)-Ni(2)-N(2)  | 96.19(12)  |
| O(2)-Ni(2)-O(1)   | 80.80(9)   | O(1)-Ni(2)-N(2)   | 100.87(11) |
| O(2)-Ni(2)-N(2)   | 79.40(11)  | O(2)-Ni(2)-O(11)  | 95.90(10)  |
| O(1W)-Ni(2)-O(11) | 92.89(11)  | N(2)-Ni(2)-O(11)  | 88.61(12)  |
| O(1)-Ni(2)-O(11)  | 169.12(11) | O(2)-Ni(2)-O(4)   | 88.09(9)   |
| O(1W)-Ni(2)-O(4)  | 96.51(11)  | N(2)-Ni(2)-O(4)   | 167.30(11) |
| O(1)-Ni(2)-O(4)   | 79.04(10)  | O(11)-Ni(2)-O(4)  | 90.53(11)  |
| O(10)-Ni(3)-O(7)  | 89.47(12)  | O(7)-Ni(3)-O(1)   | 92.04(11)  |
| O(10)-Ni(3)-O(1)  | 105.27(11) | O(7)-Ni(3)-N(3)   | 86.13(13)  |
| O(10)-Ni(3)-N(3)  | 89.97(12)  | O(10)-Ni(3)-O(3)  | 168.49(12) |
| O(1)-Ni(3)-N(3)   | 164.65(11) | O(1)-Ni(3)-O(3)   | 85.30(9)   |
| O(7)-Ni(3)-O(3)   | 94.77(10)  | O(10)-Ni(3)-O(4)  | 97.08(11)  |
| N(3)-Ni(3)-O(3)   | 79.67(11)  | O(7)-Ni(3)-O(4)   | 169.80(11) |
| O(1)-Ni(3)-O(4)   | 78.72(10)  | N(3)-Ni(3)-O(4)   | 101.63(12) |
| O(3)-Ni(3)-O(4)   | 80.30(9)   | N(4)-Ni(4)-O(12)  | 89.03(12)  |
| O(2W)-Ni(4)-O(3)  | 93.79(11)  | O(3)-Ni(4)-O(2)   | 79.17(9)   |
| O(2W)-Ni(4)-O(2)  | 94.63(12)  | O(3)-Ni(4)-N(4)   | 98.88(11)  |
| O(2W)-Ni(4)-N(4)  | 97.57(13)  | O(2W)-Ni(4)-O(4)  | 173.72(12) |
| O(2)-Ni(4)-N(4)   | 167.75(11) | O(2)-Ni(4)-O(4)   | 88.40(9)   |
| O(3)-Ni(4)-O(4)   | 81.35(9)   | O(2W)-Ni(4)-O(12) | 92.04(12)  |
| N(4)-Ni(4)-O(4)   | 79.36(11)  | O(2)-Ni(4)-O(12)  | 91.62(11)  |
| O(3)-Ni(4)-O(12)  | 169.46(10) | O(4)-Ni(4)-O(12)  | 93.38(10)  |
| <b>Compound 2</b> |            |                   |            |
| Ni(1)-Ni(3)       | 3.1987(4)  | Ni(2)-Ni(4)       | 3.2081(4)  |
| Ni(1)-Ni(2)       | 2.9251(4)  | Ni(1)-Ni(4)       | 3.1538(5)  |



|                   |            |                  |            |
|-------------------|------------|------------------|------------|
| Ni(2)-Ni(3)       | 3.0959(4)  | Ni(3)-Ni(4)      | 2.9384(4)  |
| Ni(1)-O(6)        | 2.0178(14) | Ni(1)-N(1)       | 2.0727(16) |
| Ni(1)-O(4)        | 2.0653(14) | Ni(1)-O(1)       | 2.0797(13) |
| Ni(1)-O(7)        | 2.0729(15) | Ni(1)-O(2)       | 2.0352(13) |
| Ni(2)-O(2)        | 2.0379(13) | Ni(2)-O(13)      | 2.0450(14) |
| Ni(2)-O(8)        | 2.0409(15) | Ni(2)-O(1)       | 2.0674(13) |
| Ni(2)-O(3)        | 2.0619(14) | Ni(2)-N(2)       | 2.0864(16) |
| Ni(3)-O(1W)       | 2.0083(15) | Ni(3)-O(3)       | 2.0595(13) |
| Ni(3)-O(4)        | 2.0441(13) | Ni(3)-O(12)      | 2.0736(15) |
| Ni(3)-N(3)        | 2.0687(16) | Ni(3)-O(2)       | 2.0778(14) |
| Ni(4)-O(4)        | 2.0820(13) | Ni(4)-O(11)      | 2.0489(15) |
| Ni(4)-O(9)        | 2.0280(14) | Ni(4)-O(3)       | 2.0786(13) |
| Ni(4)-N(4)        | 2.0899(16) | Ni(4)-O(1)       | 2.0616(14) |
| O(6)-Ni(1)-O(4)   | 103.19(6)  | O(7)-Ni(1)-O(1)  | 91.00(5)   |
| O(6)-Ni(1)-O(2)   | 103.52(6)  | O(6)-Ni(1)-N(1)  | 91.15(6)   |
| O(2)-Ni(1)-O(4)   | 78.07(5)   | O(4)-Ni(1)-N(1)  | 101.79(6)  |
| O(2)-Ni(1)-N(1)   | 165.02(6)  | O(2)-Ni(1)-O(7)  | 91.04(6)   |
| O(6)-Ni(1)-O(7)   | 86.84(6)   | N(1)-Ni(1)-O(7)  | 86.70(6)   |
| O(4)-Ni(1)-O(7)   | 166.58(5)  | O(2)-Ni(1)-O(1)  | 86.27(5)   |
| O(6)-Ni(1)-O(1)   | 170.00(6)  | N(1)-Ni(1)-O(1)  | 78.98(6)   |
| O(4)-Ni(1)-O(1)   | 80.59(5)   | O(2)-Ni(2)-O(8)  | 95.78(6)   |
| O(2)-Ni(2)-O(13)  | 170.48(6)  | O(8)-Ni(2)-O(13) | 93.29(6)   |
| O(2)-Ni(2)-O(3)   | 82.70(5)   | O(8)-Ni(2)-O(3)  | 169.12(5)  |
| O(13)-Ni(2)-O(3)  | 88.93(6)   | O(2)-Ni(2)-O(1)  | 86.52(5)   |
| O(8)-Ni(2)-O(1)   | 90.83(6)   | O(13)-Ni(2)-O(1) | 96.26(5)   |
| O(3)-Ni(2)-O(1)   | 78.33(5)   | O(2)-Ni(2)-N(2)  | 79.29(6)   |
| O(8)-Ni(2)-N(2)   | 86.71(6)   | O(13)-Ni(2)-N(2) | 98.37(6)   |
| O(3)-Ni(2)-N(2)   | 103.52(6)  | O(1)-Ni(2)-N(2)  | 165.27(6)  |
| O(1W)-Ni(3)-O(4)  | 93.61(6)   | O(1W)-Ni(3)-O(3) | 172.61(7)  |
| O(4)-Ni(3)-O(3)   | 87.18(5)   | O(1W)-Ni(3)-N(3) | 99.23(7)   |
| O(4)-Ni(3)-N(3)   | 167.08(6)  | O(3)-Ni(3)-N(3)  | 79.91(6)   |
| O(1W)-Ni(3)-O(12) | 95.43(7)   | O(4)-Ni(3)-O(12) | 91.92(6)   |
| O(3)-Ni(3)-O(12)  | 91.88(6)   | N(3)-Ni(3)-O(12) | 88.27(6)   |
| O(1W)-Ni(3)-O(2)  | 91.20(6)   | O(4)-Ni(3)-O(2)  | 77.59(5)   |
| O(3)-Ni(3)-O(2)   | 81.79(5)   | N(3)-Ni(3)-O(2)  | 100.63(6)  |
| O(12)-Ni(3)-O(2)  | 167.94(5)  | O(9)-Ni(4)-O(11) | 91.66(6)   |
| O(9)-Ni(4)-O(1)   | 96.06(6)   | O(11)-Ni(4)-O(1) | 168.07(5)  |
| O(9)-Ni(4)-O(3)   | 106.92(5)  | O(11)-Ni(4)-O(3) | 90.99(6)   |

|                   |            |                  |            |
|-------------------|------------|------------------|------------|
| O(1)-Ni(4)-O(3)   | 78.08(5)   | O(9)-Ni(4)-O(4)  | 166.13(6)  |
| O(11)-Ni(4)-O(4)  | 93.93(6)   | O(1)-Ni(4)-O(4)  | 80.63(5)   |
| O(3)-Ni(4)-O(4)   | 85.69(5)   | O(9)-Ni(4)-N(4)  | 89.68(6)   |
| O(11)-Ni(4)-N(4)  | 90.18(6)   | O(1)-Ni(4)-N(4)  | 98.92(6)   |
| O(3)-Ni(4)-N(4)   | 163.32(6)  | O(4)-Ni(4)-N(4)  | 77.63(6)   |
| <b>Compound 3</b> |            |                  |            |
| Ni(1)-Ni(3)       | 3.0804(11) | Ni(2)-Ni(4)      | 3.1104(11) |
| Ni(1)-Ni(2)       | 3.1803(12) | Ni(1)-Ni(4)      | 3.0965(10) |
| Ni(2)-Ni(3)       | 3.0832(11) | Ni(3)-Ni(4)      | 3.1818(11) |
| Ni(1)-N(1)        | 2.037(5)   | Ni(1)-O(5)       | 2.091(5)   |
| Ni(1)-O(3)        | 2.049(3)   | Ni(1)-Cl(1)      | 2.3492(15) |
| Ni(1)-O(1)        | 2.063(4)   | Ni(1)-O(2)       | 2.107(4)   |
| Ni(2)-N(2)        | 2.054(5)   | Ni(2)-O(6)       | 2.110(5)   |
| Ni(2)-O(2)        | 2.053(4)   | Ni(2)-Cl(2)      | 2.3623(18) |
| Ni(2)-O(4)        | 2.057(4)   | Ni(2)-O(1)       | 2.116(5)   |
| Ni(3)-N(3)        | 2.043(4)   | Ni(3)-O(4)       | 2.087(4)   |
| Ni(3)-O(2)        | 2.039(3)   | Ni(3)-Cl(3)      | 2.3729(17) |
| Ni(3)-O(3)        | 2.054(4)   | Ni(3)-O(7)       | 2.089(4)   |
| Ni(4)-O(1)        | 2.058(4)   | Ni(4)-O(3)       | 2.099(4)   |
| Ni(4)-N(4)        | 2.056(5)   | Ni(4)-Cl(4)      | 2.3588(18) |
| Ni(4)-O(4)        | 2.066(4)   | Ni(4)-O(8)       | 2.107(5)   |
| N(1)-Ni(1)-O(1)   | 79.81(18)  | N(1)-Ni(1)-O(5)  | 89.2(2)    |
| N(1)-Ni(1)-O(3)   | 162.28(18) | O(1)-Ni(1)-O(5)  | 90.95(19)  |
| O(3)-Ni(1)-O(1)   | 82.70(15)  | O(3)-Ni(1)-O(2)  | 81.71(14)  |
| O(3)-Ni(1)-O(5)   | 88.28(17)  | O(5)-Ni(1)-O(2)  | 167.47(16) |
| N(1)-Ni(1)-O(2)   | 98.08(18)  | O(3)-Ni(1)-Cl(1) | 100.19(11) |
| O(1)-Ni(1)-O(2)   | 80.36(17)  | O(5)-Ni(1)-Cl(1) | 92.98(14)  |
| N(1)-Ni(1)-Cl(1)  | 97.46(15)  | O(1)-Ni(1)-Cl(1) | 175.18(12) |
| O(2)-Ni(1)-Cl(1)  | 96.18(11)  | O(2)-Ni(2)-N(2)  | 79.61(16)  |
| N(2)-Ni(2)-O(4)   | 161.20(18) | N(2)-Ni(2)-O(6)  | 86.4(2)    |
| O(2)-Ni(2)-O(4)   | 82.38(15)  | O(2)-Ni(2)-O(1)  | 80.38(16)  |
| O(2)-Ni(2)-O(6)   | 91.99(17)  | O(4)-Ni(2)-O(1)  | 81.40(16)  |
| O(4)-Ni(2)-O(6)   | 88.93(18)  | O(2)-Ni(2)-Cl(2) | 175.01(14) |
| N(2)-Ni(2)-O(1)   | 100.7(2)   | O(4)-Ni(2)-Cl(2) | 100.17(13) |
| O(6)-Ni(2)-O(1)   | 168.36(17) | O(1)-Ni(2)-Cl(2) | 95.70(12)  |
| N(2)-Ni(2)-Cl(2)  | 98.20(14)  | O(6)-Ni(2)-Cl(2) | 92.35(14)  |
| O(2)-Ni(3)-O(3)   | 83.26(15)  | O(2)-Ni(3)-O(4)  | 81.99(15)  |
| O(2)-Ni(3)-N(3)   | 162.18(17) | O(3)-Ni(3)-O(4)  | 80.06(16)  |

|                   |            |                  |            |
|-------------------|------------|------------------|------------|
| N(3)-Ni(3)-O(3)   | 79.91(16)  | N(3)-Ni(3)-O(7)  | 88.95(18)  |
| N(3)-Ni(3)-O(4)   | 100.71(17) | O(4)-Ni(3)-O(7)  | 167.06(17) |
| O(2)-Ni(3)-O(7)   | 86.21(16)  | N(3)-Ni(3)-Cl(3) | 96.95(14)  |
| O(3)-Ni(3)-O(7)   | 93.33(16)  | O(4)-Ni(3)-Cl(3) | 95.60(13)  |
| O(2)-Ni(3)-Cl(3)  | 100.33(12) | O(3)-Ni(3)-Cl(3) | 173.99(11) |
| O(7)-Ni(3)-Cl(3)  | 91.72(13)  | N(4)-Ni(4)-O(1)  | 162.1(2)   |
| O(1)-Ni(4)-O(4)   | 82.59(17)  | O(1)-Ni(4)-O(3)  | 81.63(14)  |
| N(4)-Ni(4)-O(4)   | 80.34(17)  | N(4)-Ni(4)-O(8)  | 86.7(2)    |
| N(4)-Ni(4)-O(3)   | 100.28(17) | O(4)-Ni(4)-O(8)  | 91.3(2)    |
| O(4)-Ni(4)-O(3)   | 79.53(16)  | N(4)-Ni(4)-Cl(4) | 96.83(14)  |
| O(1)-Ni(4)-O(8)   | 88.56(18)  | O(4)-Ni(4)-Cl(4) | 174.40(13) |
| O(3)-Ni(4)-O(8)   | 167.33(17) | O(8)-Ni(4)-Cl(4) | 93.34(18)  |
| O(1)-Ni(4)-Cl(4)  | 100.62(14) | O(3)-Ni(4)-Cl(4) | 96.32(12)  |
| <b>Compound 4</b> |            |                  |            |
| Ni(1)-Ni(3)       | 3.1628(16) | Ni(2)-Ni(4)      | 3.150(2)   |
| Ni(1)-Ni(2)       | 3.1238(17) | Ni(1)-Ni(4)      | 3.1196(19) |
| Ni(2)-Ni(3)       | 3.1081(15) | Ni(3)-Ni(4)      | 3.1048(17) |
| Ni(1)-O(4)        | 2.041(6)   | Ni(1)-O(5)       | 2.105(11)  |
| Ni(1)-O(1)        | 2.045(7)   | Ni(1)-Br(1)      | 2.506(2)   |
| Ni(1)-N(1)        | 2.073(9)   | Ni(1)-O(3)       | 2.119(7)   |
| Ni(2)-O(1)        | 2.052(5)   | Ni(2)-O(4)       | 2.106(8)   |
| Ni(2)-N(2)        | 2.045(6)   | Ni(2)-Br(2)      | 2.5061(16) |
| Ni(2)-O(2)        | 2.055(6)   | Ni(2)-O(6)       | 2.124(9)   |
| Ni(3)-O(7)        | 2.093(6)   | Ni(3)-N(3)       | 2.071(6)   |
| Ni(3)-O(3)        | 2.037(7)   | Ni(3)-Br(3)      | 2.5133(16) |
| Ni(3)-O(2)        | 2.071(5)   | Ni(3)-O(1)       | 2.105(6)   |
| Ni(4)-O(3)        | 2.050(6)   | Ni(4)-O(2)       | 2.077(6)   |
| Ni(4)-O(4)        | 2.050(7)   | Ni(4)-Br(4)      | 2.5325(18) |
| Ni(4)-N(4)        | 2.059(7)   | Ni(4)-O(8)       | 2.087(10)  |
| O(4)-Ni(1)-N(1)   | 160.4(4)   | O(4)-Ni(1)-O(5)  | 88.5(3)    |
| O(4)-Ni(1)-O(1)   | 81.6(3)    | N(1)-Ni(1)-O(5)  | 87.2(4)    |
| O(1)-Ni(1)-N(1)   | 79.4(4)    | O(1)-Ni(1)-O(3)  | 80.1(3)    |
| O(1)-Ni(1)-O(5)   | 91.6(5)    | O(5)-Ni(1)-O(3)  | 167.0(3)   |
| O(4)-Ni(1)-O(3)   | 80.4(2)    | O(1)-Ni(1)-Br(1) | 174.90(17) |
| N(1)-Ni(1)-O(3)   | 101.0(3)   | O(5)-Ni(1)-Br(1) | 92.9(4)    |
| O(4)-Ni(1)-Br(1)  | 100.8(2)   | O(3)-Ni(1)-Br(1) | 95.8(2)    |
| N(1)-Ni(1)-Br(1)  | 98.5(3)    | O(1)-Ni(2)-O(2)  | 82.7(2)    |
| N(2)-Ni(2)-O(1)   | 161.8(3)   | O(1)-Ni(2)-O(4)  | 79.9(3)    |

|                  |            |                  |            |
|------------------|------------|------------------|------------|
| N(2)-Ni(2)-O(2)  | 80.5(2)    | N(2)-Ni(2)-O(6)  | 83.4(3)    |
| N(2)-Ni(2)-O(4)  | 104.0(3)   | O(2)-Ni(2)-O(6)  | 91.2(3)    |
| O(2)-Ni(2)-O(4)  | 80.2(2)    | N(2)-Ni(2)-Br(2) | 96.78(19)  |
| O(1)-Ni(2)-O(6)  | 90.0(3)    | O(2)-Ni(2)-Br(2) | 174.92(18) |
| O(4)-Ni(2)-O(6)  | 167.4(2)   | O(6)-Ni(2)-Br(2) | 92.8(2)    |
| O(1)-Ni(2)-Br(2) | 100.47(18) | O(4)-Ni(2)-Br(2) | 96.37(19)  |
| O(3)-Ni(3)-O(2)  | 81.7(2)    | O(3)-Ni(3)-O(7)  | 91.5(3)    |
| O(3)-Ni(3)-N(3)  | 79.8(3)    | O(2)-Ni(3)-O(7)  | 88.5(2)    |
| N(3)-Ni(3)-O(2)  | 160.4(3)   | N(3)-Ni(3)-O(1)  | 102.2(2)   |
| N(3)-Ni(3)-O(7)  | 85.6(3)    | O(7)-Ni(3)-O(1)  | 167.6(3)   |
| O(3)-Ni(3)-O(1)  | 80.6(3)    | N(3)-Ni(3)-Br(3) | 97.3(2)    |
| O(2)-Ni(3)-O(1)  | 81.0(2)    | O(7)-Ni(3)-Br(3) | 92.57(18)  |
| O(3)-Ni(3)-Br(3) | 174.89(19) | O(2)-Ni(3)-Br(3) | 101.56(17) |
| O(1)-Ni(3)-Br(3) | 95.9(2)    | O(4)-Ni(4)-O(3)  | 81.8(2)    |
| O(4)-Ni(4)-N(4)  | 80.5(3)    | O(3)-Ni(4)-N(4)  | 161.8(3)   |
| O(4)-Ni(4)-O(2)  | 81.0(3)    | O(3)-Ni(4)-O(2)  | 81.2(2)    |
| N(4)-Ni(4)-O(2)  | 100.0(3)   | O(4)-Ni(4)-O(8)  | 94.1(4)    |
| O(3)-Ni(4)-O(8)  | 87.0(3)    | N(4)-Ni(4)-O(8)  | 90.2(3)    |
| O(2)-Ni(4)-O(8)  | 167.7(3)   | O(4)-Ni(4)-Br(4) | 174.51(17) |
| O(3)-Ni(4)-Br(4) | 102.02(19) | N(4)-Ni(4)-Br(4) | 95.9(3)    |
| O(2)-Ni(4)-Br(4) | 95.64(16)  | O(8)-Ni(4)-Br(4) | 90.1(4)    |

**Table S3 Hydrogen bonding parameters for 1 – 4**

| D-H...A                                                                                                  | D-H (Å)   | H...A (Å) | D...A (Å) | ∠D-H...A (°) |
|----------------------------------------------------------------------------------------------------------|-----------|-----------|-----------|--------------|
| <b>Compound 1</b>                                                                                        |           |           |           |              |
| O1W-H1W1...O9                                                                                            | 0.832(18) | 1.76(2)   | 2.585(4)  | 70(4)        |
| O1W-H2W1...O11#1                                                                                         | 0.836(18) | 1.93(2)   | 2.729(4)  | 159(4)       |
| O2W-H1W2...O5                                                                                            | 0.829(19) | 1.762(19) | 2.590(5)  | 175(5)       |
| O2W-H2W2...O12#2                                                                                         | 0.832(19) | 1.90(2)   | 2.721(4)  | 172(5)       |
| O3W-H1W3...O8                                                                                            | 0.857(19) | 2.03(3)   | 2.837(5)  | 157(6)       |
| O3W-H2W3...O9                                                                                            | 0.849(19) | 1.92(2)   | 2.766(5)  | 176(6)       |
| Symmetry codes for generating equivalent atoms: #1 -x + 1, -y, -z; #2 -x, -y, -z; #3 -x + 1, -y + 1, -z. |           |           |           |              |
| <b>Compound 2</b>                                                                                        |           |           |           |              |
| O1W-H1W1...O5                                                                                            | 0.813(17) | 1.836(17) | 2.647(2)  | 174(3)       |
| O2W-H1W2...O15                                                                                           | 0.903(17) | 1.863(17) | 2.765(3)  | 176(3)       |
| O13-H1O3...O10                                                                                           | 0.814(16) | 1.786(16) | 2.597(2)  | 175(3)       |
| O14-H1O4...O2W                                                                                           | 0.883(18) | 1.90(2)   | 2.770(3)  | 166(4)       |
| O15-H1O5...O10                                                                                           | 0.875(18) | 1.854(19) | 2.725(3)  | 173(4)       |

|                  |           |           |          |        |
|------------------|-----------|-----------|----------|--------|
| O2W-H2W2...O6#1  | 0.849(17) | 2.52(3)   | 3.121(3) | 129(3) |
| O2W-H2W2...O7#1  | 0.849(17) | 2.21(2)   | 2.996(2) | 153(3) |
| O1W-H2W1...O3W#2 | 0.864(17) | 1.835(18) | 2.664(2) | 160(3) |
| O3W-H2W3...O5    | 0.834(17) | 1.878(17) | 2.710(2) | 176(3) |

Symmetry codes for generating equivalent atoms: #1  $x + 1, y, z$ ; #2  $-x + 1, -y + 1, -z$ ; #3  $x + 1, y - 1, z$ .

|                   |          |            |           |          |
|-------------------|----------|------------|-----------|----------|
| <b>Compound 3</b> |          |            |           |          |
| O5-H1O5...Cl4     | 0.833(4) | 2.2510(16) | 3.047(5)  | 160.2(3) |
| O6-H1O6...Cl3     | 0.839(5) | 2.2432(17) | 3.046(5)  | 160.4(3) |
| O7-H1O7...Cl1     | 0.841(4) | 2.2059(14) | 3.017(4)  | 162.0(3) |
| O8-H1O8...Cl2     | 0.853(6) | 2.3204(18) | 3.042(5)  | 142.5(4) |
| <b>Compound 4</b> |          |            |           |          |
| O6-H1O6...Br3     | 0.82(2)  | 2.32(3)    | 3.135(6)  | 172(11)  |
| O7-H1O7...Br4     | 0.83(2)  | 2.41(4)    | 3.190(6)  | 157(9)   |
| O5-H1O5...Br2     | 0.82(2)  | 2.36(7)    | 3.151(11) | 162(20)  |
| O8-H1O8...Br1     | 0.83(2)  | 2.34(3)    | 3.157(12) | 174(17)  |

**Table S4 Comparison of different catalysts with NiNPs/C-450 for the reduction of 4-nitrophenol to 4-aminophenol**

| Sample                                                                 | Type          | $k$<br>( $\times 10^{-3} \text{ s}^{-1}$ ) | $\kappa$<br>( $\times 10^{-3} \text{ mg}^{-1} \cdot \text{s}^{-1}$ ) | Converse<br>(%) | Reference |
|------------------------------------------------------------------------|---------------|--------------------------------------------|----------------------------------------------------------------------|-----------------|-----------|
| Fe <sub>3</sub> O <sub>4</sub> @SiO <sub>2</sub> -Au@mSiO <sub>2</sub> | microsphere   | 5.8                                        | 1.93                                                                 | 90(8)           | 6         |
| Ni/SiO <sub>2</sub> @Au                                                | microsphere   | 10                                         | 2.5                                                                  | 73(8)           | 7         |
| p(AMPS)-Ni                                                             | hydrogel      | 0.9                                        | 0.15                                                                 | 75(5)           | 8         |
| Au@C                                                                   | nanocomposite | 3.6                                        | 1.8                                                                  | 32(10)          | 9         |
| Ni(modified)                                                           | nanoparticles | 2.4                                        | 0.80                                                                 | /               | 10        |
| NiNPs/C-450                                                            | nanocomposite | 19                                         | 9.5                                                                  | 97(10)          | this work |

**Table S5 The BET surface area, total pore volume, and average pore size of NiNPs/C-450, NiNPs/C-500, NiNPs/C-550, NiNPs/C-600.**

| Sample      | BET surface area<br>( $\text{m}^2 \cdot \text{g}^{-1}$ ) | Pore volume<br>( $\text{cm}^3 \cdot \text{g}^{-1}$ ) | Average size<br>(nm) |
|-------------|----------------------------------------------------------|------------------------------------------------------|----------------------|
| NiNPs/C-450 | 125                                                      | 0.08                                                 | 2.65                 |
| NiNPs/C-500 | 101                                                      | 0.08                                                 | 3.40                 |
| NiNPs/C-550 | 52                                                       | 0.06                                                 | 4.40                 |
| NiNPs/C-600 | 2                                                        | 0.01                                                 | 14.96                |

9. Original  $^1\text{H}$  NMR,  $^{13}\text{C}$  NMR, TOF-Mass, ESI-Mass and IR spectra of HL and compounds 1 – 4.

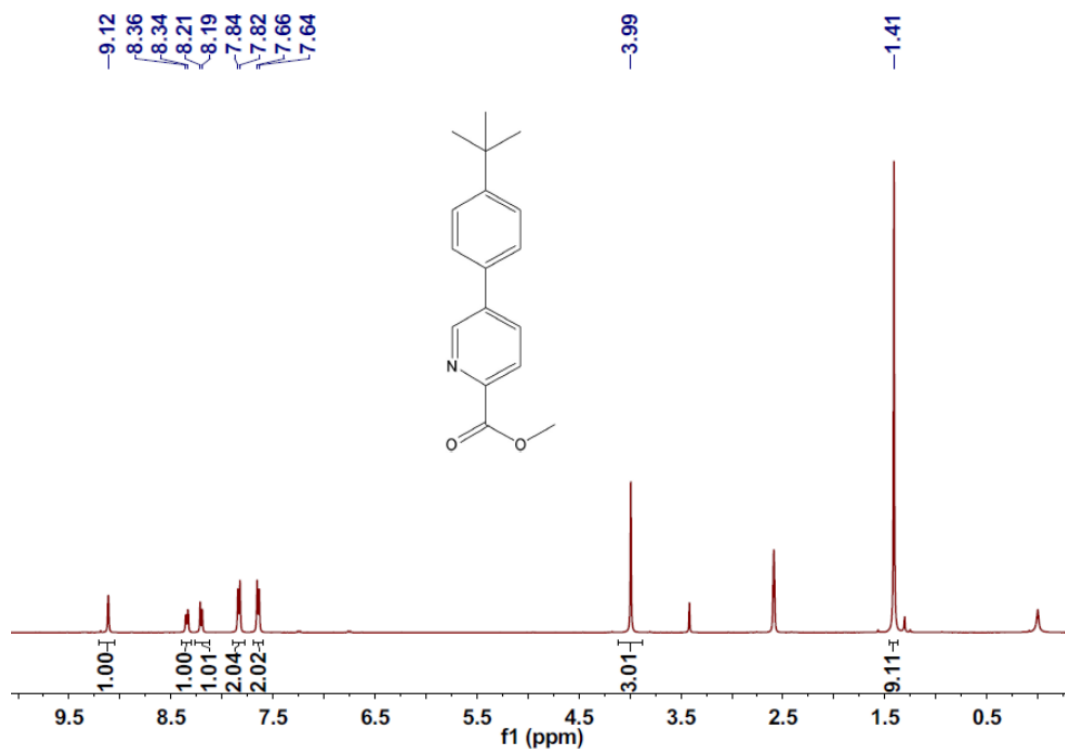

Fig. S17 The  $^1\text{H}$  NMR spectrum of methyl 5-(4-(tert-butyl)phenyl)picolinate.

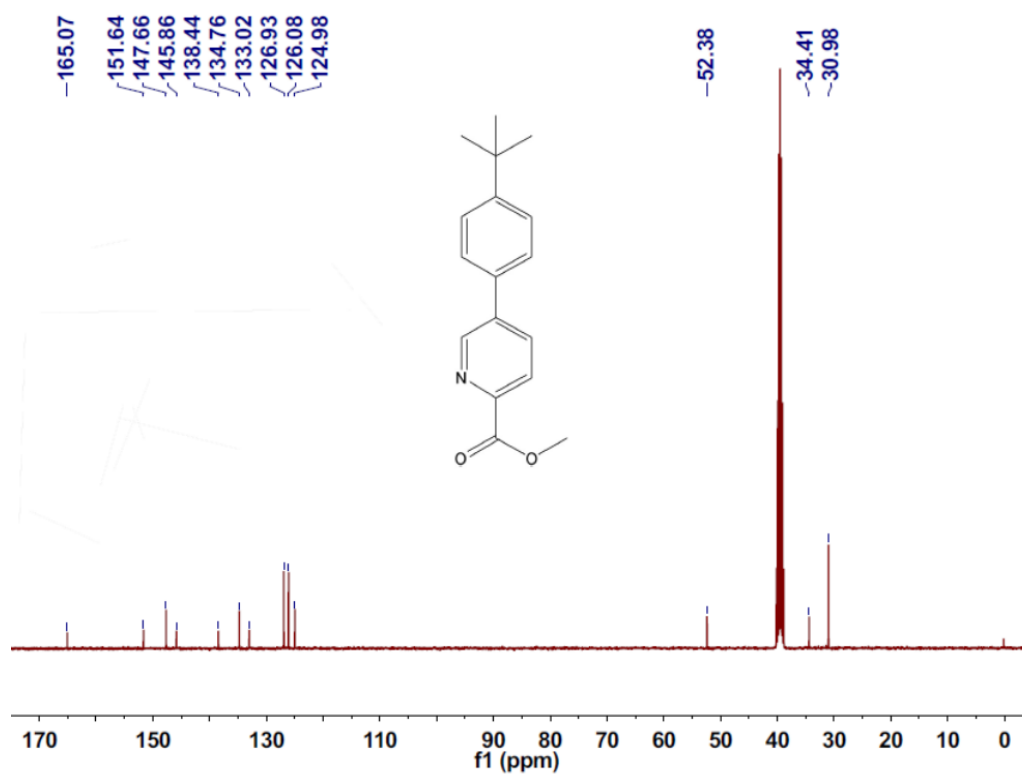

Fig. S18 The  $^{13}\text{C}$  NMR spectrum of methyl 5-(4-(tert-butyl)phenyl)picolinate.

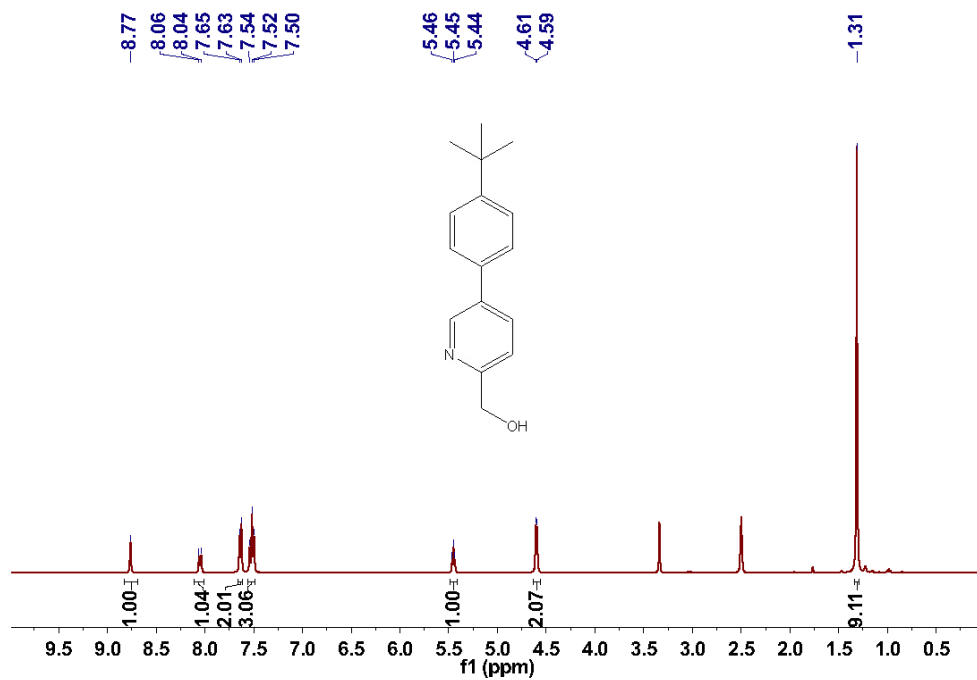

**Fig. S19** The <sup>1</sup>H NMR spectrum of (5-(4-(tert-butyl)phenyl)pyridine-2-yl)methanol.

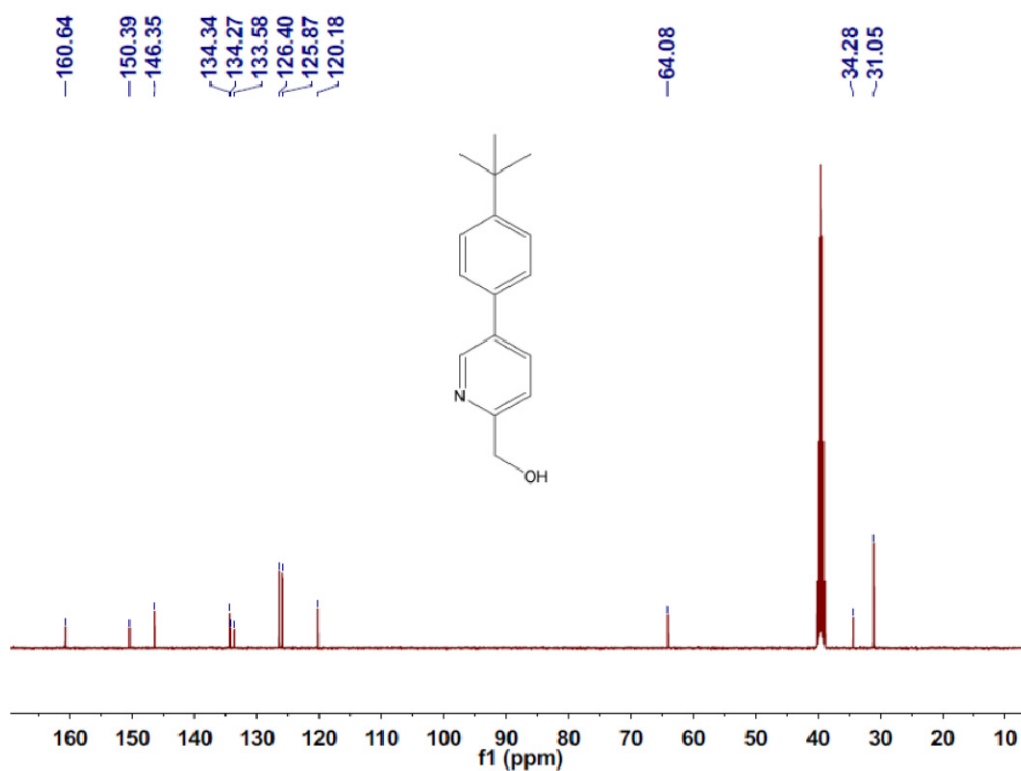

**Fig. S20** The <sup>13</sup>C NMR spectrum of (5-(4-(tert-butyl)phenyl)pyridine-2-yl)methanol.

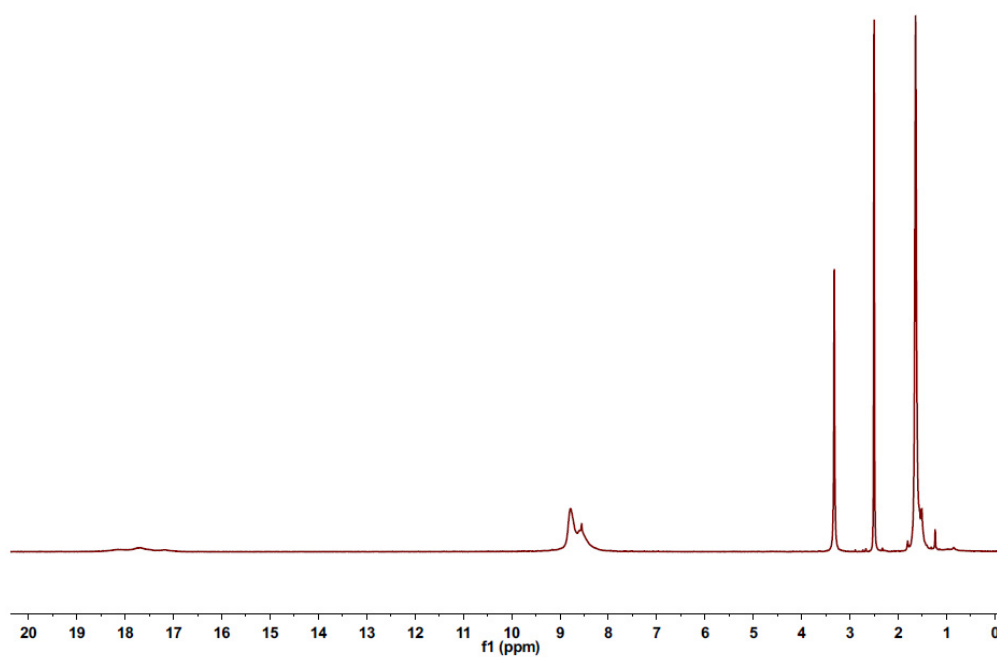

**Fig. S21** The  $^1\text{H}$  NMR spectrum of compound **1**.

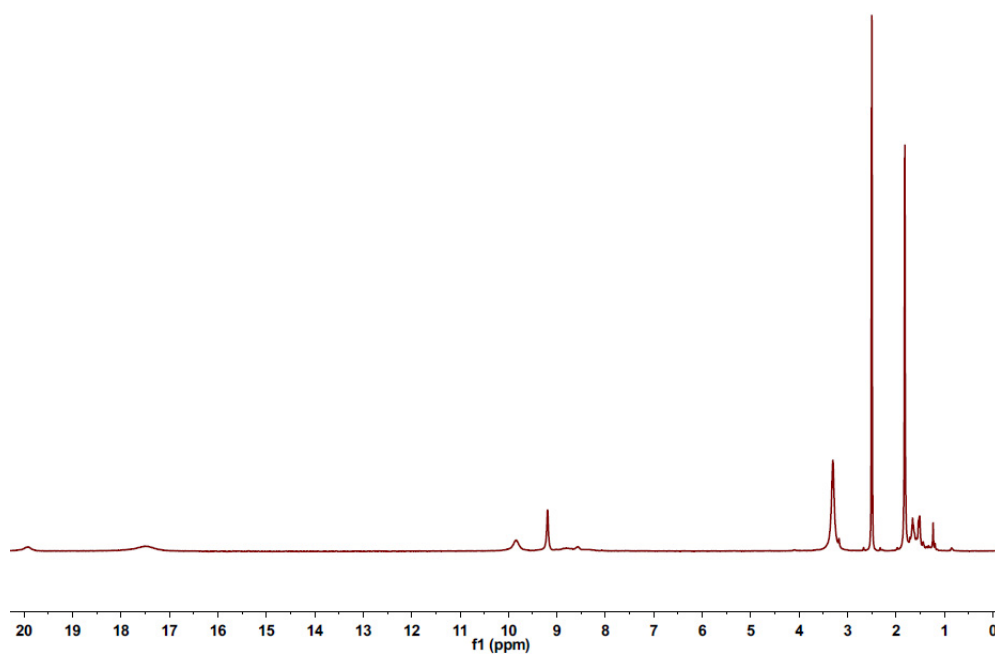

**Fig. S22** The  $^1\text{H}$  NMR spectrum of compound **2**.



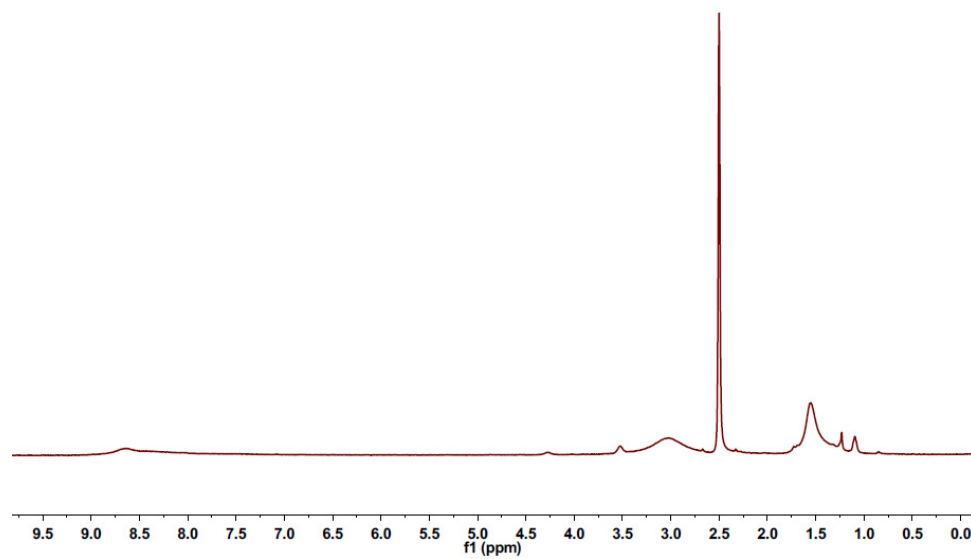

**Fig. S23** The  $^1\text{H}$  NMR spectrum of compound **3**.

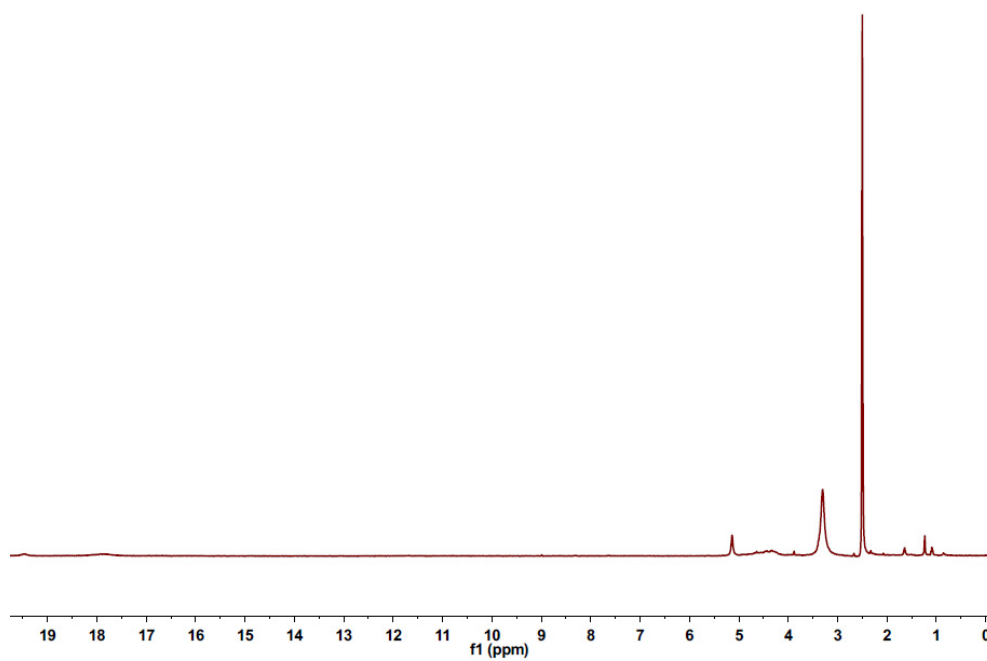

**Fig. S24** The  $^1\text{H}$  NMR spectrum of compound **4**.

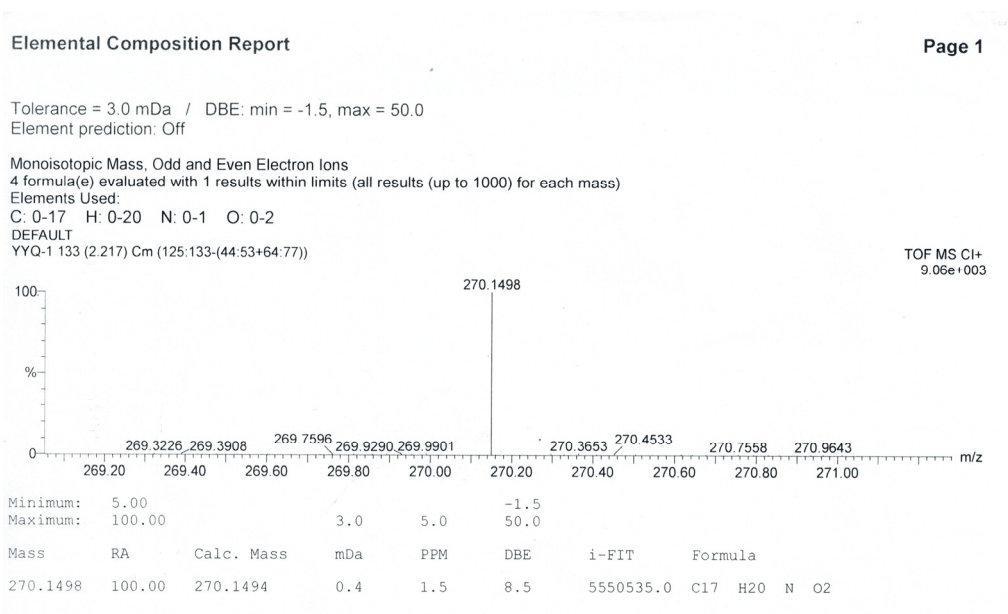

**Fig. S25** The TOF-MS spectrum of methyl 5-(4-(tert-butyl)phenyl)picolinate.

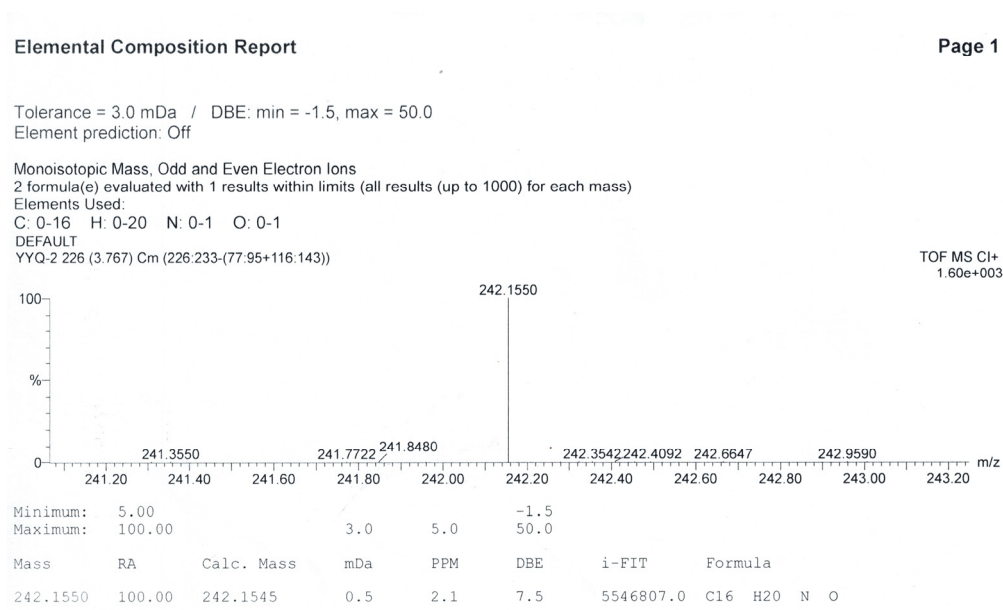

**Fig. S26** The TOF-MS spectrum of (5-(4-(tert-butyl)phenyl)pyridine-2-yl)methanol.

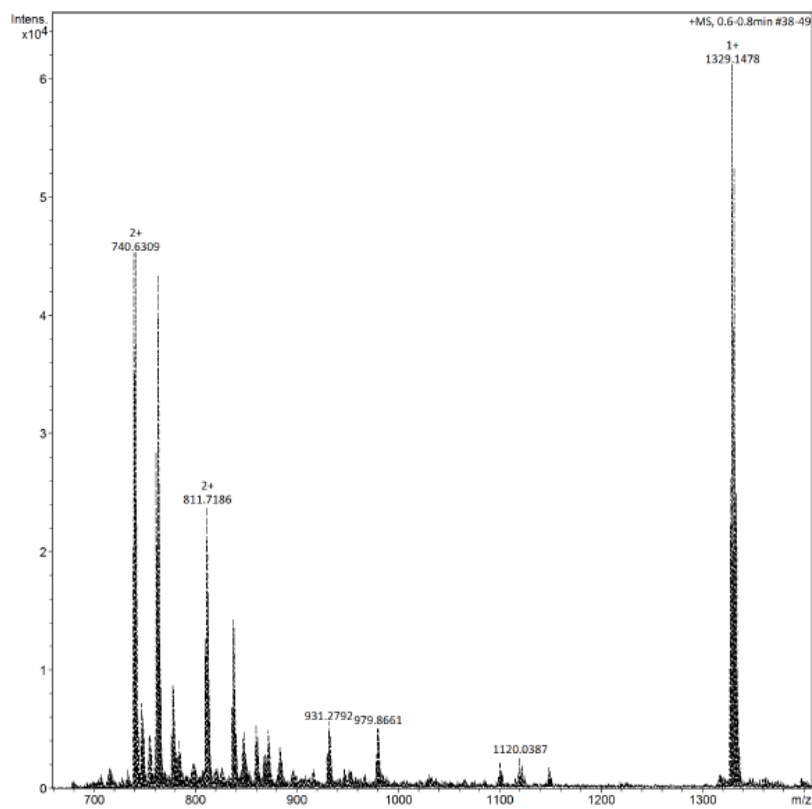

**Fig. S27** The ESI-MS spectrum of compound 1.

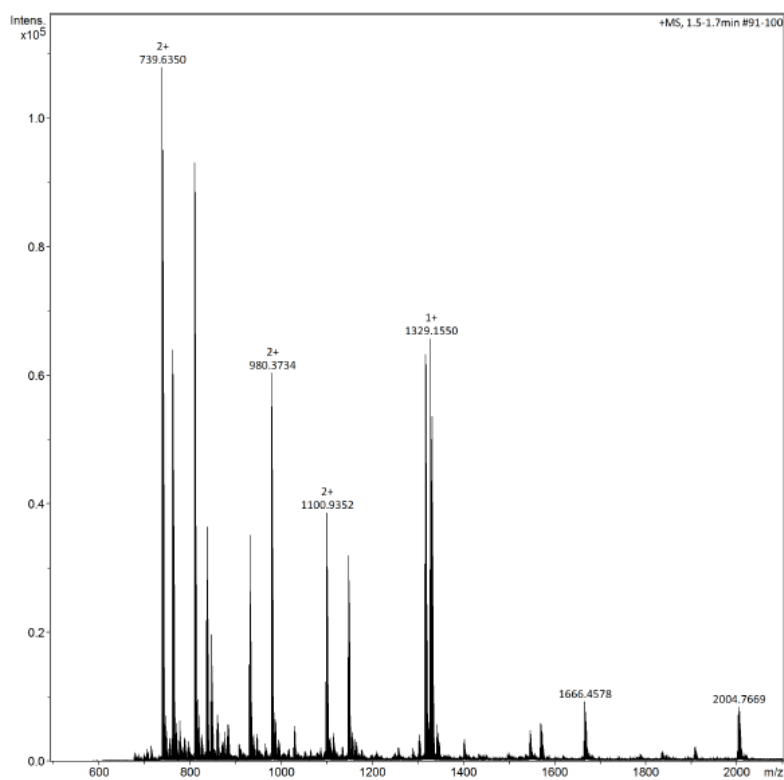

**Fig. S28** The ESI-MS spectrum of compound 2.

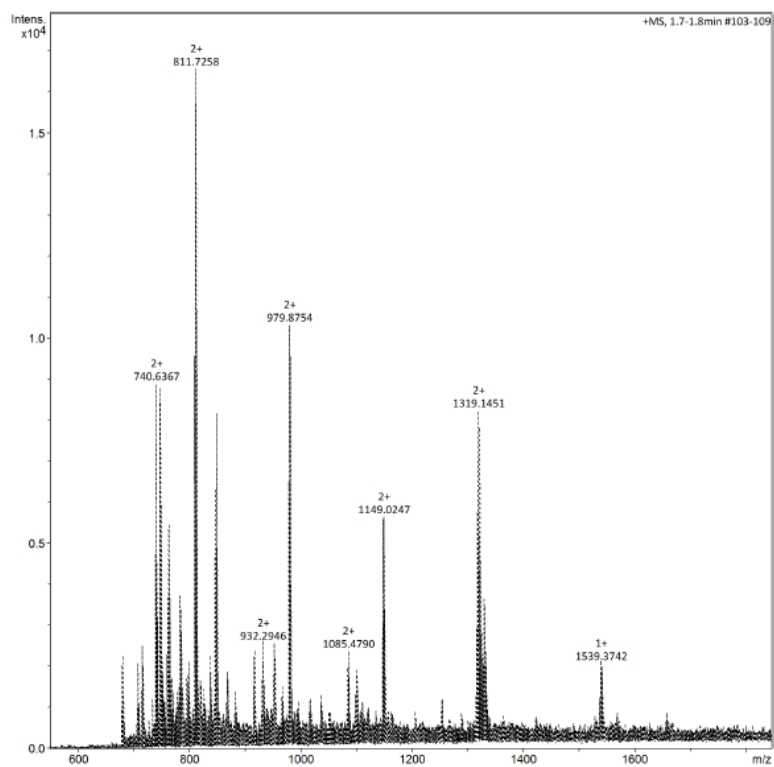

**Fig. S29** The ESI-MS spectrum of compound 3.

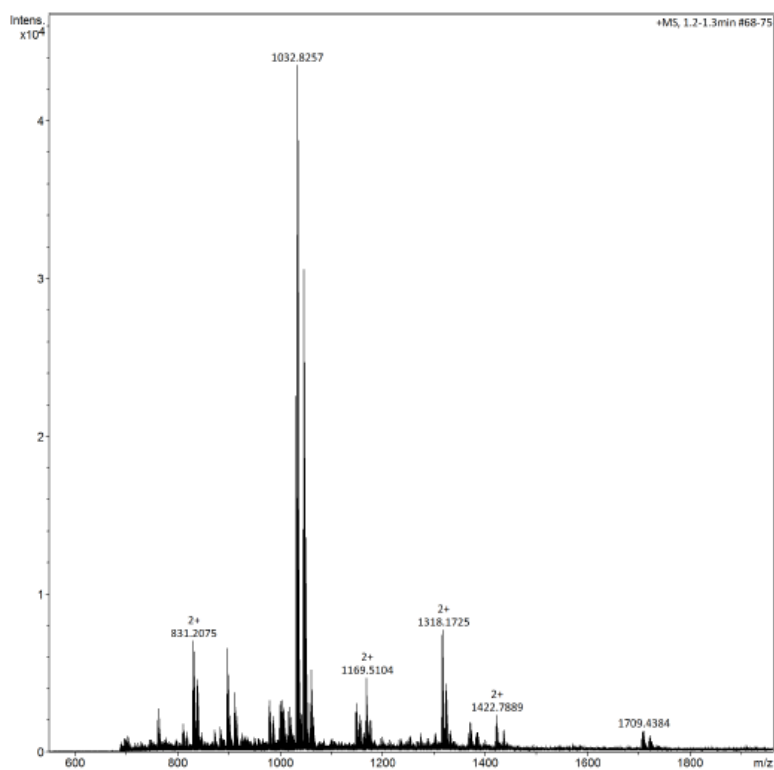

**Fig. S30** The ESI-MS spectrum of compound 4.

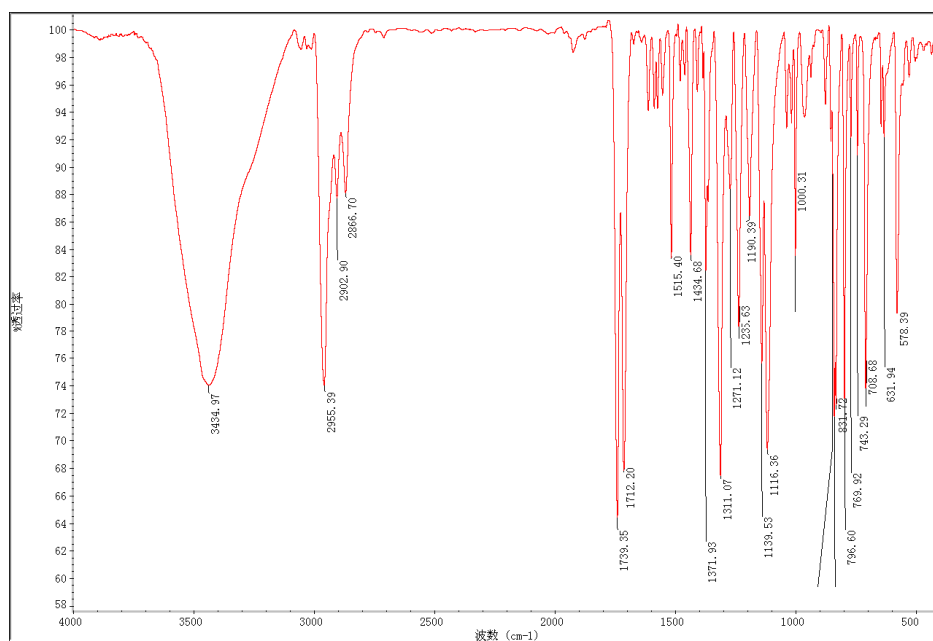

**Fig. S31** The IR spectrum of methyl 5-(4-(tert-butyl)phenyl)picolinate.

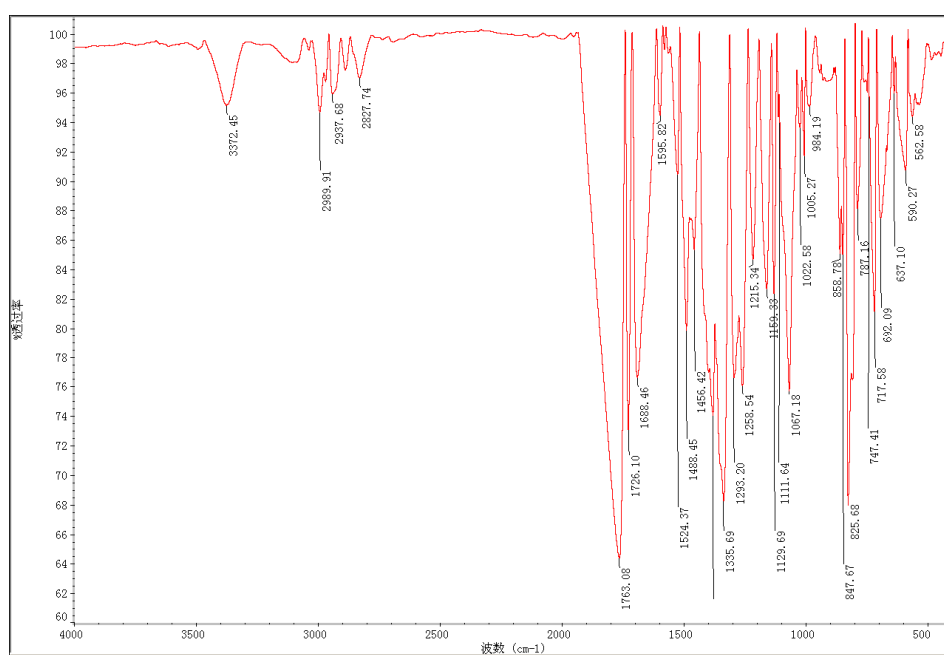

**Fig. S32** The IR spectrum of (5-(4-(tert-butyl)phenyl)pyridine-2-yl)methanol.

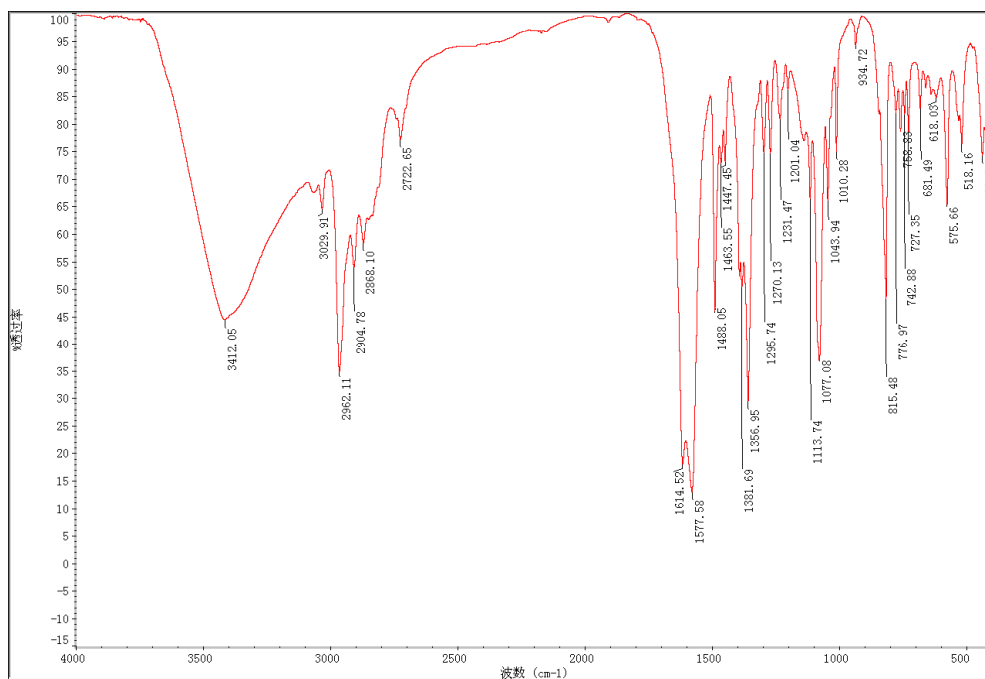

**Fig. S33** The IR spectrum of compound 1.

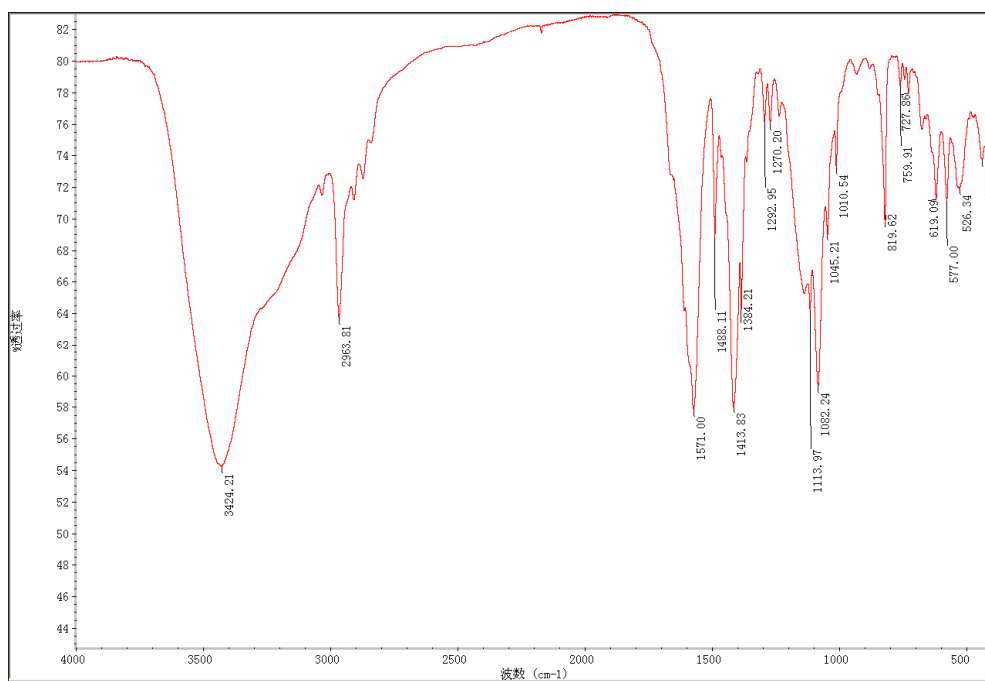

**Fig. S34** The IR spectrum of compound 2.

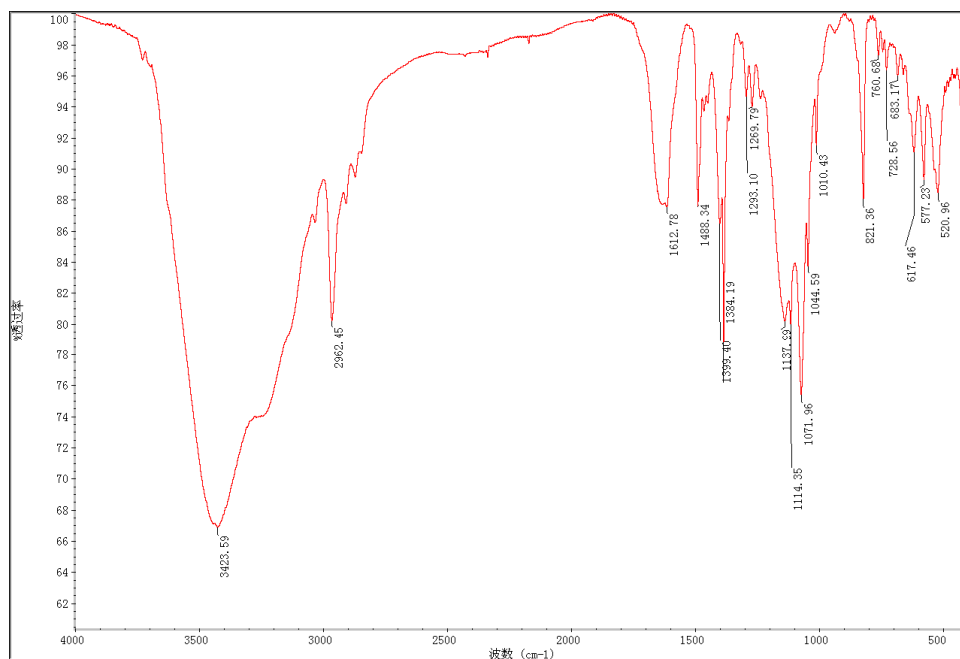

**Fig. S35** The IR spectrum of compound **3**.

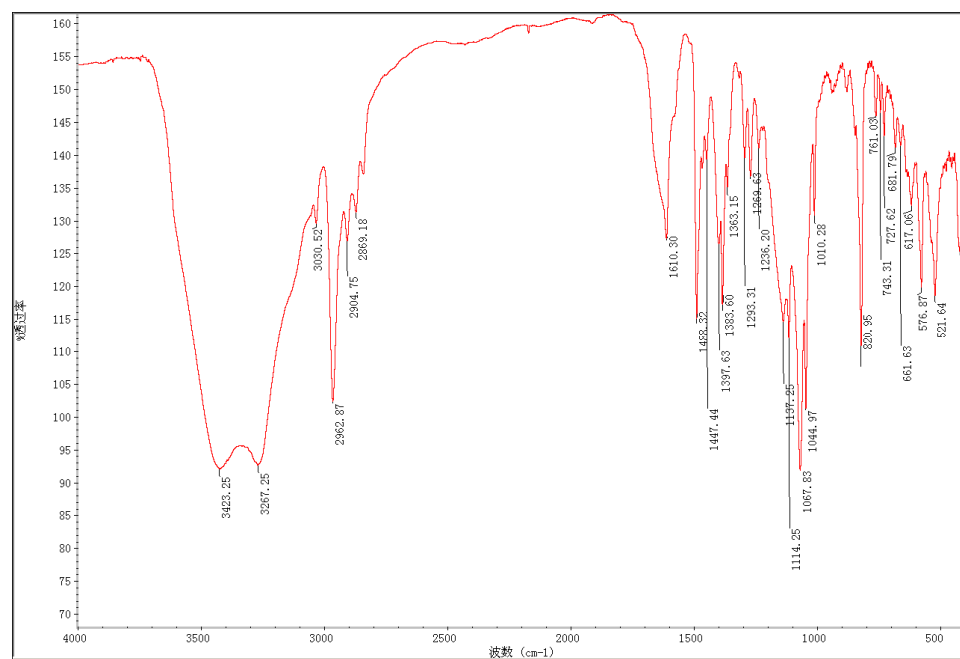

**Fig. S36** The IR spectrum of compound **4**.

## References

1. M. Armaghan, W. Y. J. Lu, D. Wu, Y. Wei, F.-L. Yuan, S. W. Ng, M. M. Amini, W.-H. Zhang, D. J. Young, T. S. A. Hor and J.-P. Lang, *RSC Adv.*, 2015, **5**, 42978–42989.
2. G. M. Sheldrick, *SADABS, Program for Empirical Absorption Correction of Area Detector Data*; University of Göttingen, Germany, 1996.

3. G. Sheldrick, *Acta Crystallogr., Sect. C*, 2015, **71**, 3–8.
4. L. J. Farrugia, *J. Appl. Cryst.*, 1999, **32**, 837–838.
5. A. L. Spek, *J. Appl. Cryst.*, 2003, **36**, 7–13.
6. Y. Deng, Y. Cai, Z. Sun, J. Liu, C. Liu, J. Wei, W. Li, C. Liu, Y. Wang and D. Zhao, *J. Am. Chem. Soc.*, 2010, **132**, 8466–8473.
7. S. Zhang, S. Gai, F. He, Y. Dai, P. Gao, L. Li, Y. Chen and P. Yang, *Nanoscale*, 2014, **6**, 7025–7032.
8. N. Sahiner, H. Ozay, O. Ozay and N. Aktas, *Appl. Catal., A*, 2010, **385**, 201–207.
9. S. Tang, S. Vongehr and X. Meng, *J. Mater. Chem.*, 2010, **20**, 5436–5445.
10. Z. Jiang, J. Xie, D. Jiang, X. Wei and M. Chen, *CrystEngComm*, 2013, **15**, 560–569.
